# Supplementary material for: Insight into the conformational selectivity of cobalt(iii) complexes with a tetradentate salen-type Schiff base ligand and their biorelevant catalysis: a combined experimental and theoretical study
Source: Royal Society of Chemistry journal article supplement (doi:10.1039/d3nj04609e), 2023-12-28
Supplement: d3nj04609e1.pdf [file d3nj04609e1.pdf]

## Supporting Information

### **Insight into the conformational selectivity in cobalt(III) complexes with a tetradentate salen-type Schiff base ligand and their biorelevant catalysis: a combined experimental and theoretical study**

Narayan Ch. Jana,<sup>\*,a</sup> Paula Brandão,<sup>b</sup> Rosa M. Gomila, Antonio Frontera<sup>\*,c</sup>  
Anangamohan Panja<sup>\*,a,d</sup>

<sup>a</sup> *Department of Chemistry, Panskura Banamali College, Panskura RS, WB 721152, India*

<sup>b</sup> *Department of Chemistry, CICECO-Aveiro Institute of Materials, University of Aveiro, 3810-193 Aveiro, Portugal*

<sup>c</sup> *Departament de Química, Universitat de les Illes Balears, Crta. de Valldemossa km 7.5, 07122 Palma de Mallorca, Balears, Spain*

<sup>d</sup> *Department of Chemistry, Gokhale Memorial Girls' College, 1/1 Harish Mukherjee Road, Kolkata-700020, India.*

\* Corresponding author

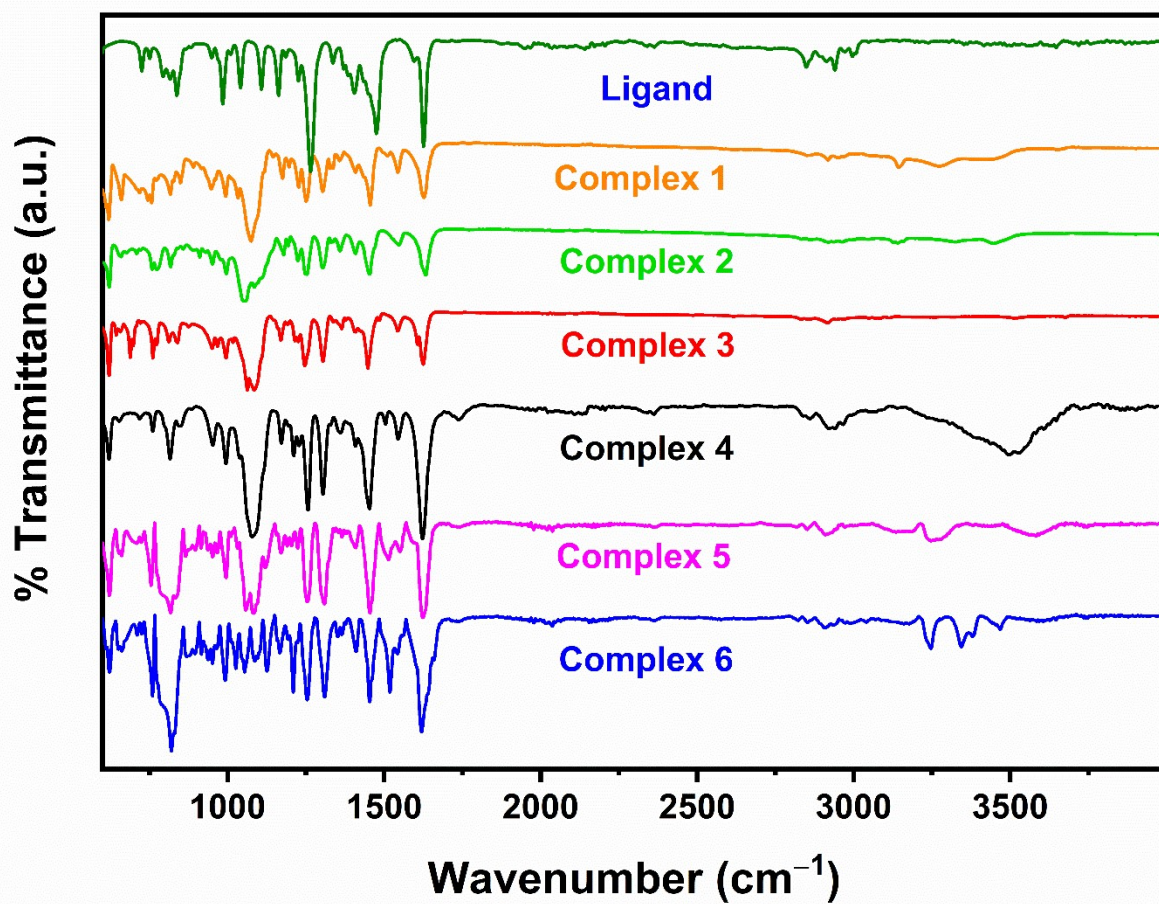

Fig. S1. IR spectra of the Ligand (H<sub>2</sub>L) and all complexes.

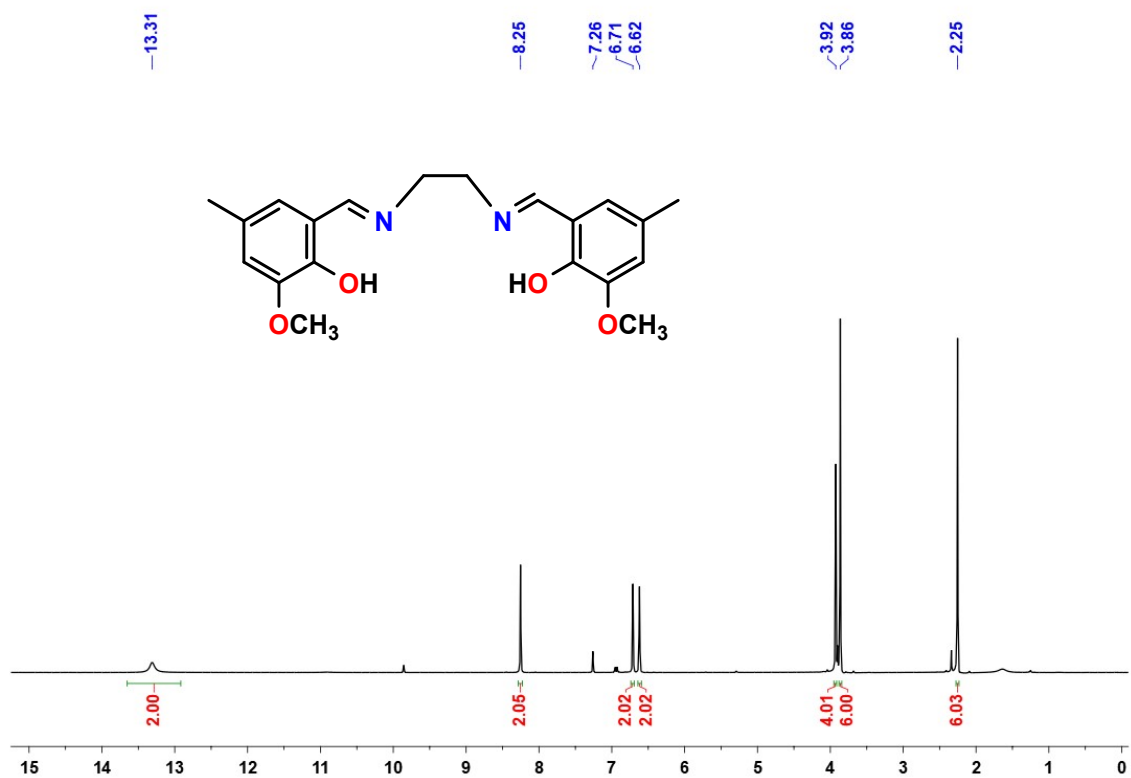

**Fig. S2.** <sup>1</sup>H NMR of *N,N'*-bis(3-methoxy-5-methylsalicylidene)-ethane-1,2-diamine in CDCl<sub>3</sub> at r.t.

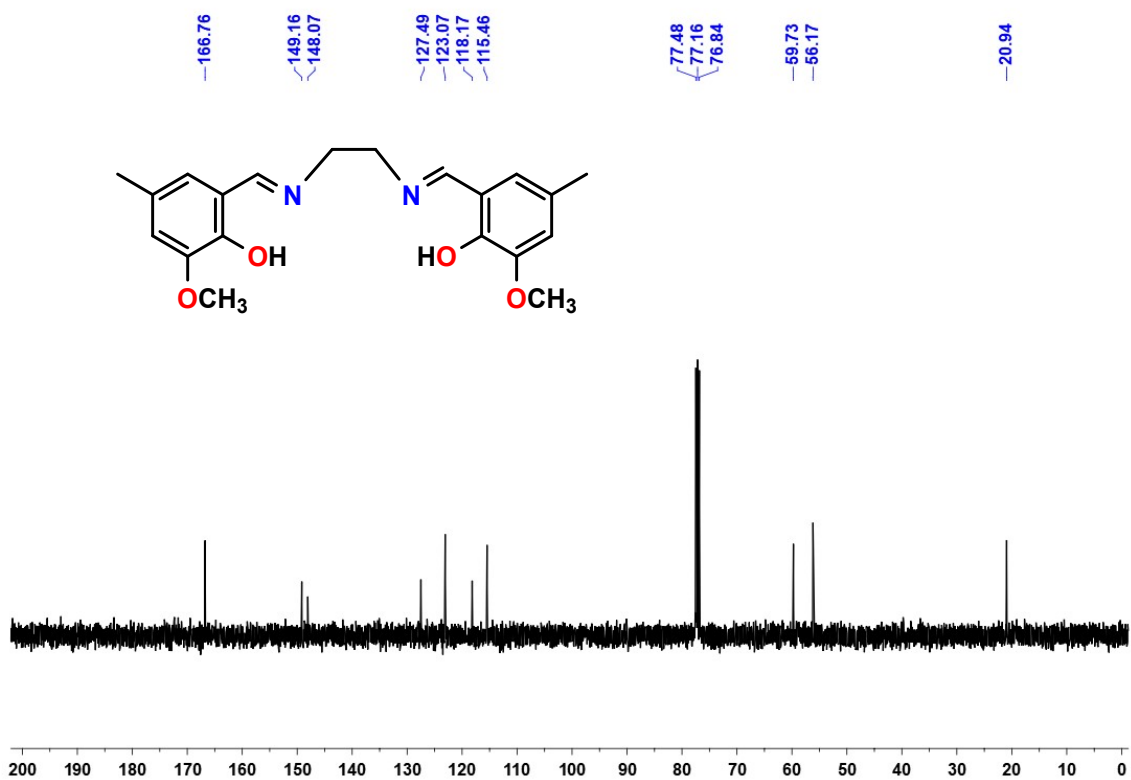

**Fig. S3.** <sup>13</sup>C NMR of *N,N'*-bis(3-methoxy-5-methylsalicylidene)-ethane-1,2-diamine in CDCl<sub>3</sub> at r.t.

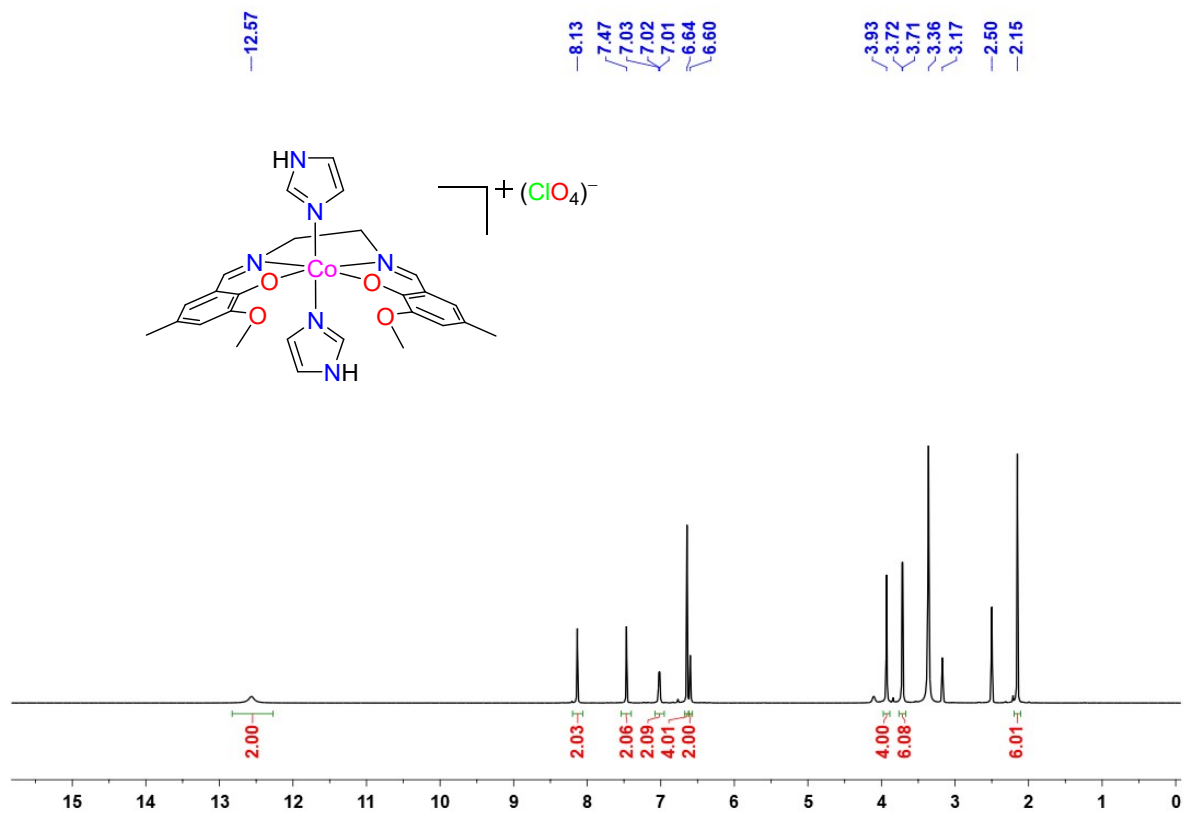

Fig. S4.  $^1\text{H}$  NMR of complex 1 in  $\text{DMSO-d}_6$  at r.t.

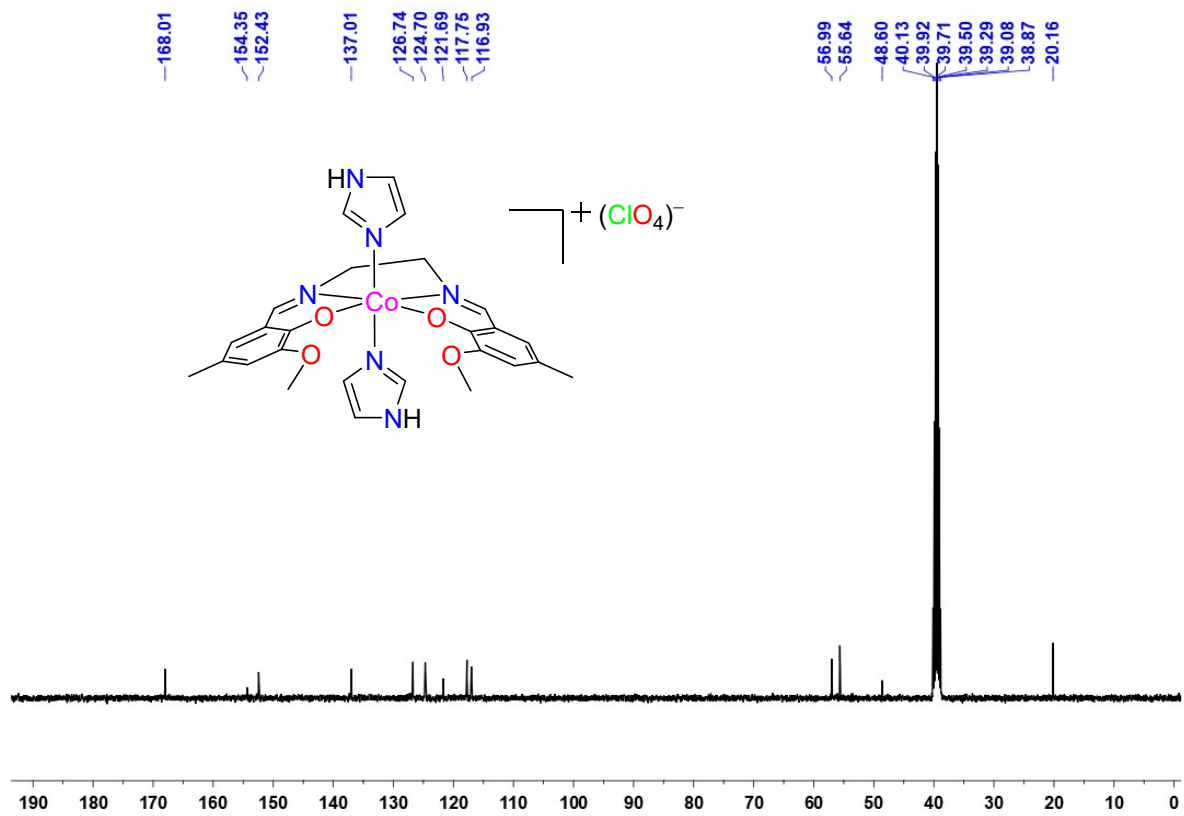

Fig. S5.  $^{13}\text{C}$  NMR of Complex 1 in  $\text{DMSO-d}_6$  at r.t.

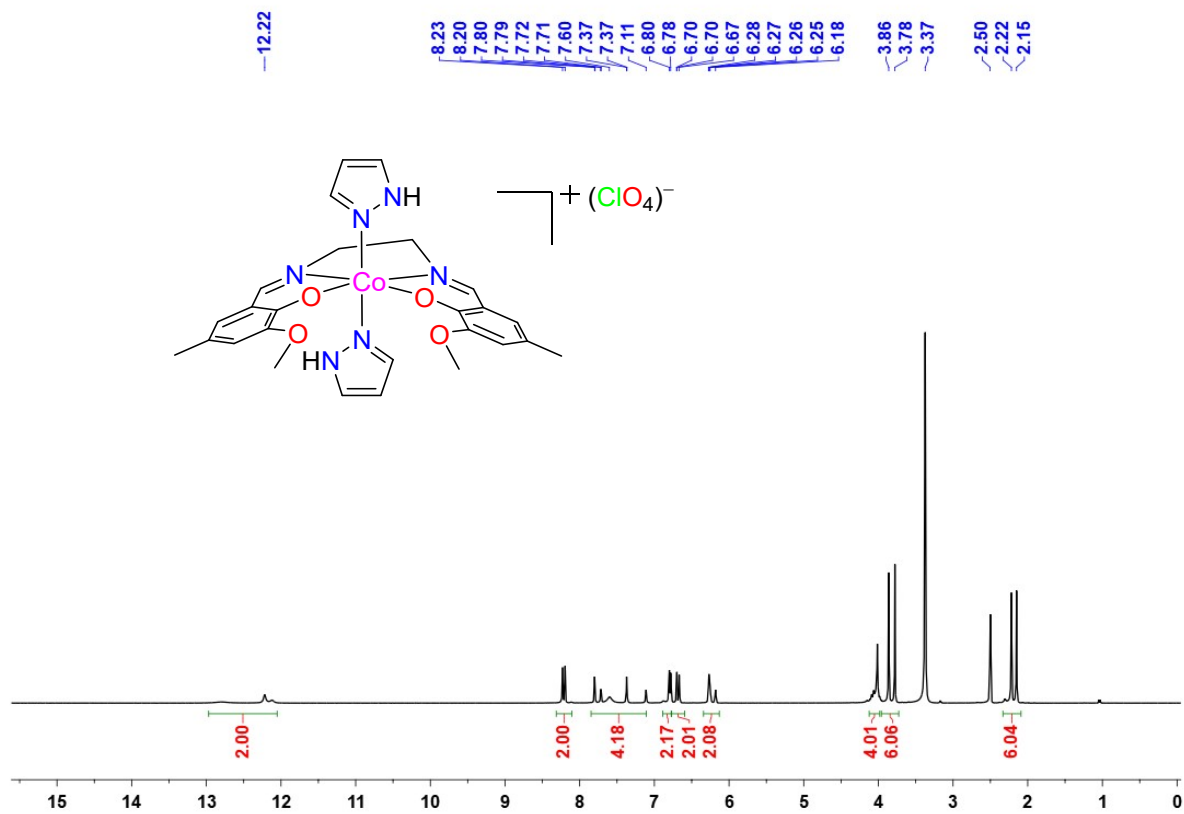

Fig. S6. <sup>1</sup>H NMR of Complex 2 in DMSO-d<sub>6</sub> at r.t.

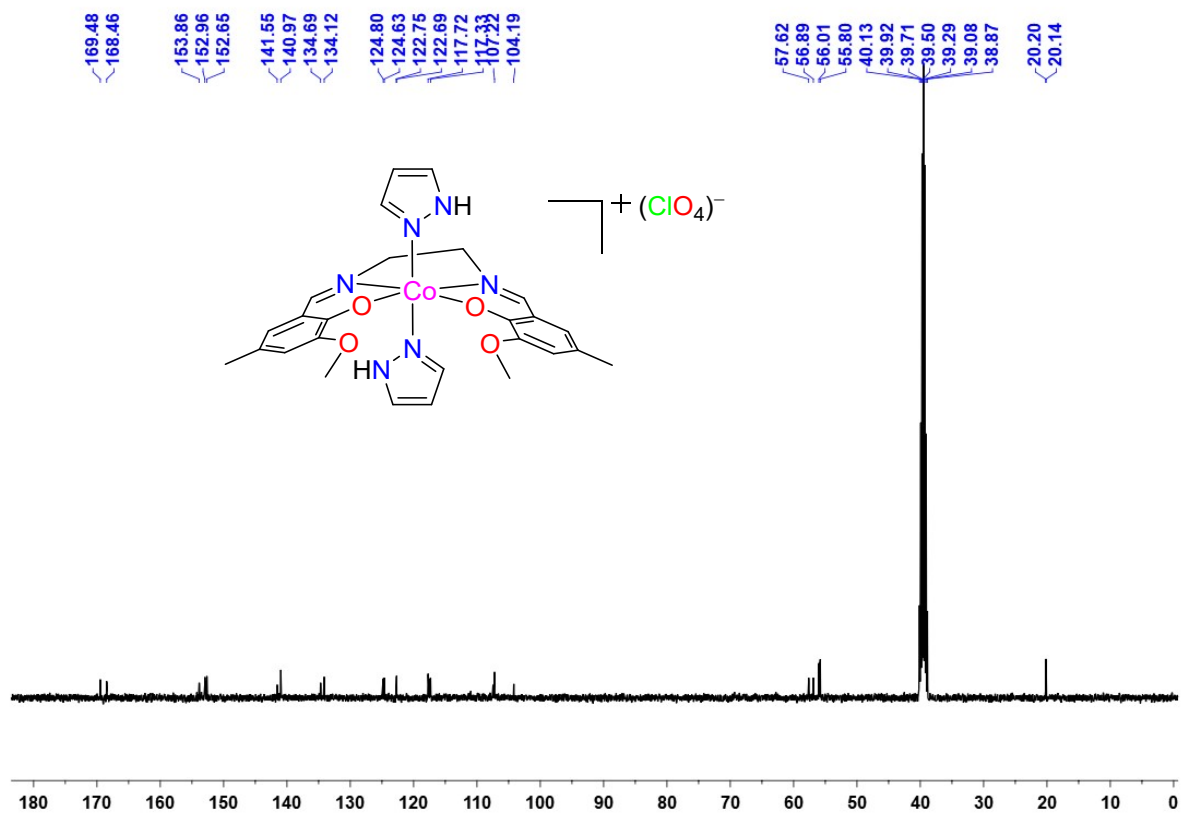

Fig. S7. <sup>13</sup>C NMR of Complex 2 in DMSO-d<sub>6</sub> at r.t.

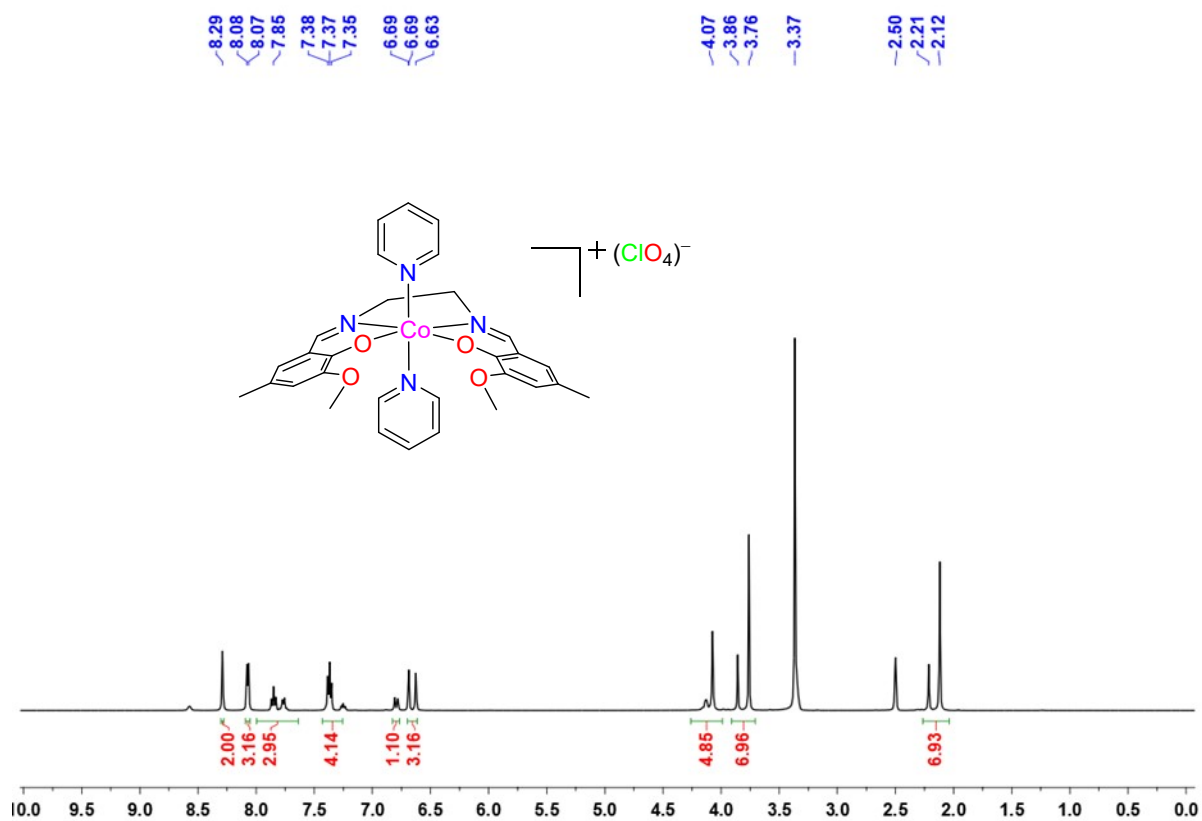

Fig. S8.  $^1\text{H NMR}$  of Complex 3 in  $\text{DMSO-d}_6$  at r.t.

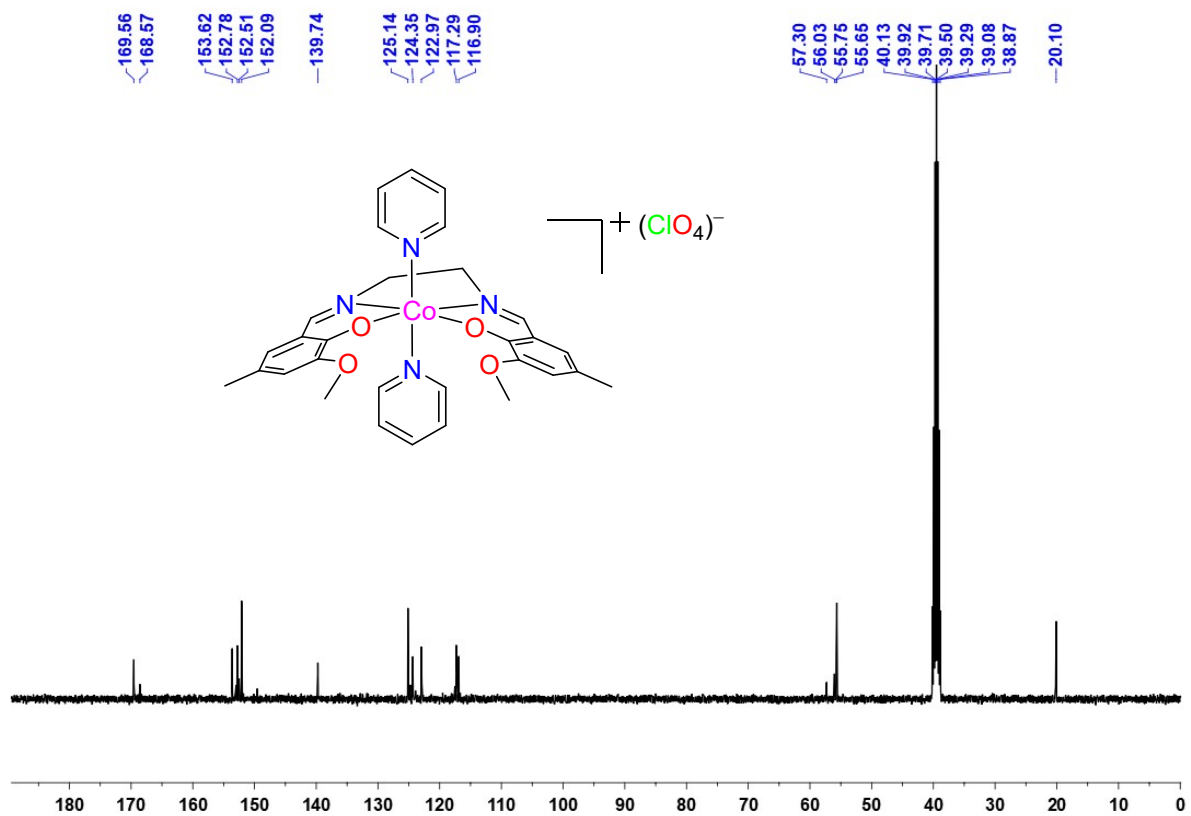

Fig. S9.  $^{13}\text{C NMR}$  of Complex 3 in  $\text{DMSO-d}_6$  at r.t.

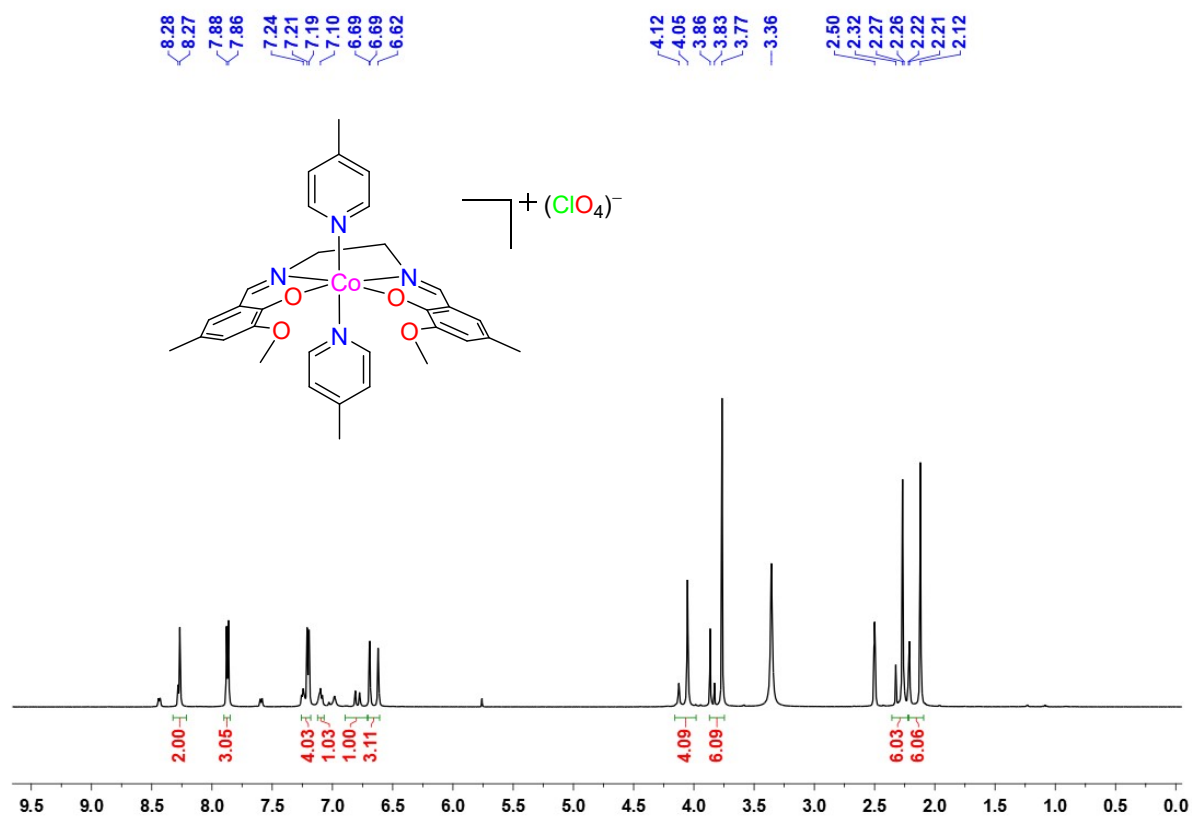

Fig. S10. <sup>1</sup>H NMR of Complex 4 in DMSO-d<sub>6</sub> at r.t.

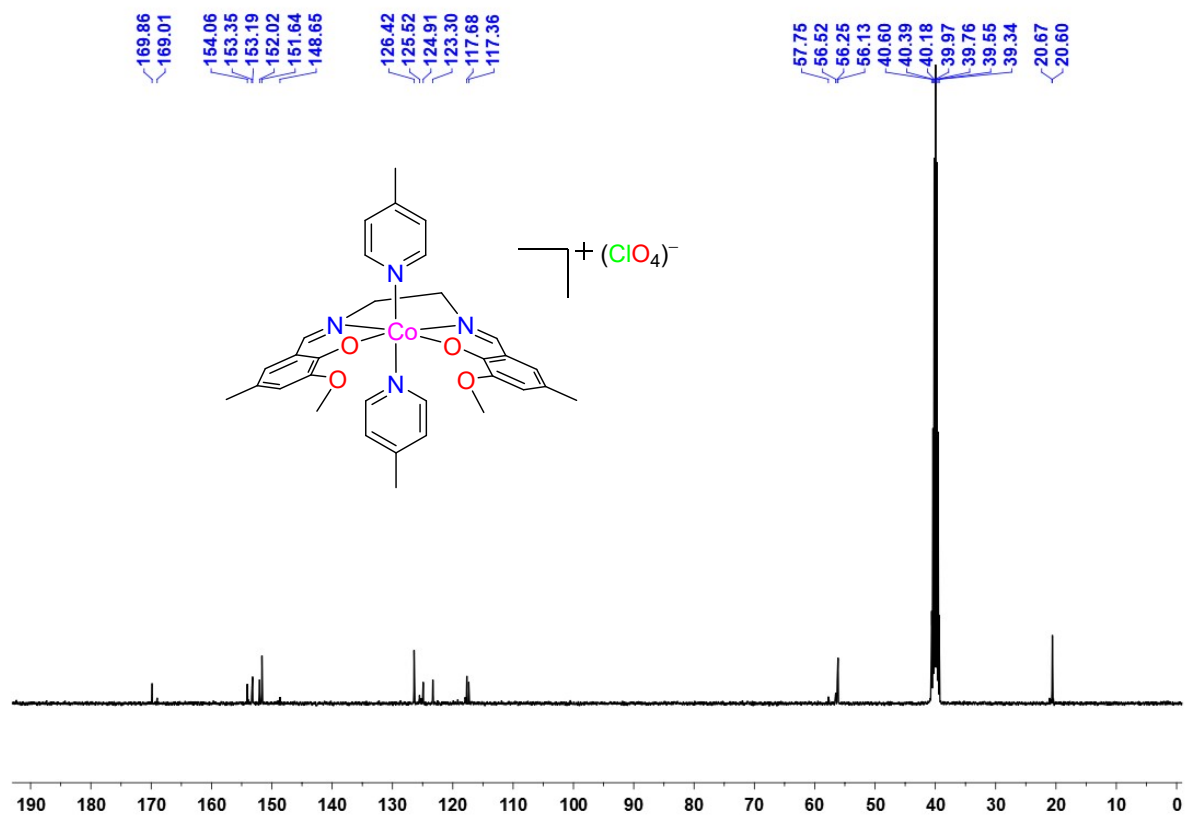

Fig. S11. <sup>13</sup>C NMR of Complex 4 in DMSO-d<sub>6</sub> at r.t.

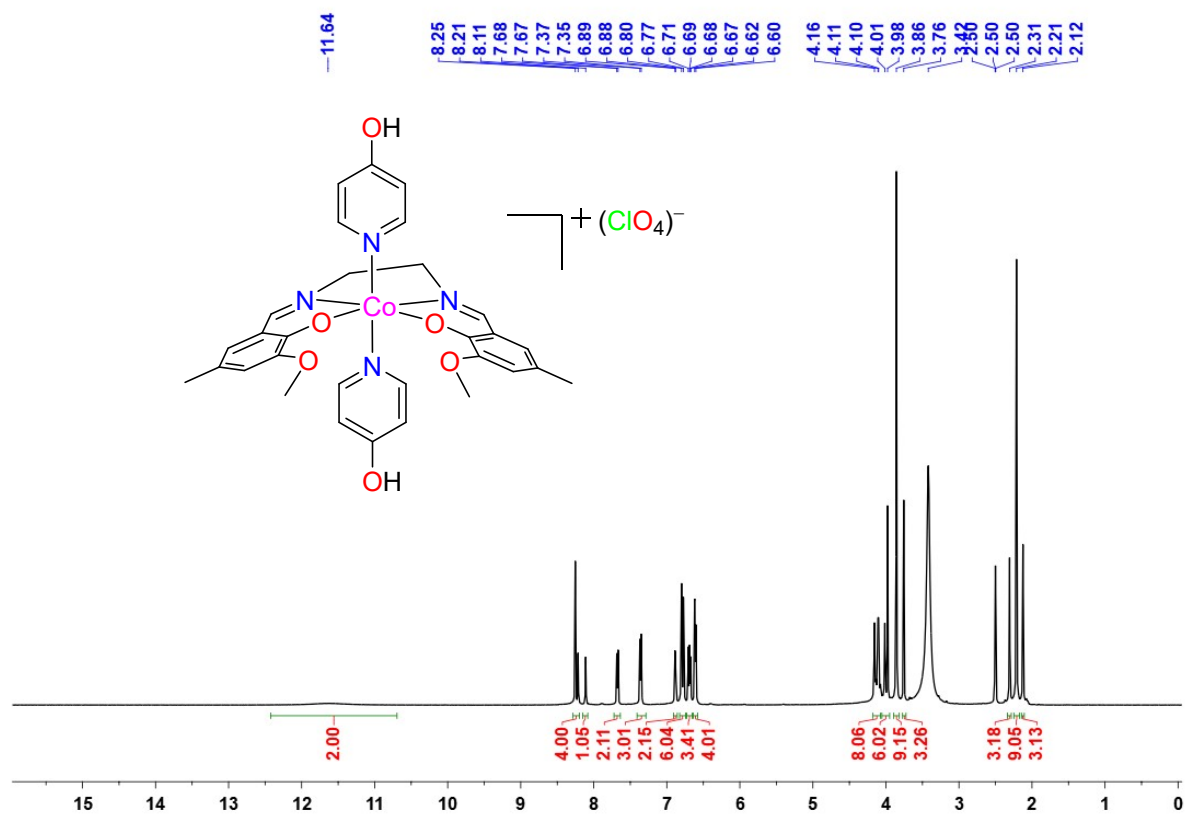

Fig. S12.  $^1\text{H NMR}$  of Complex **5** in  $\text{DMSO-d}_6$  at r.t.

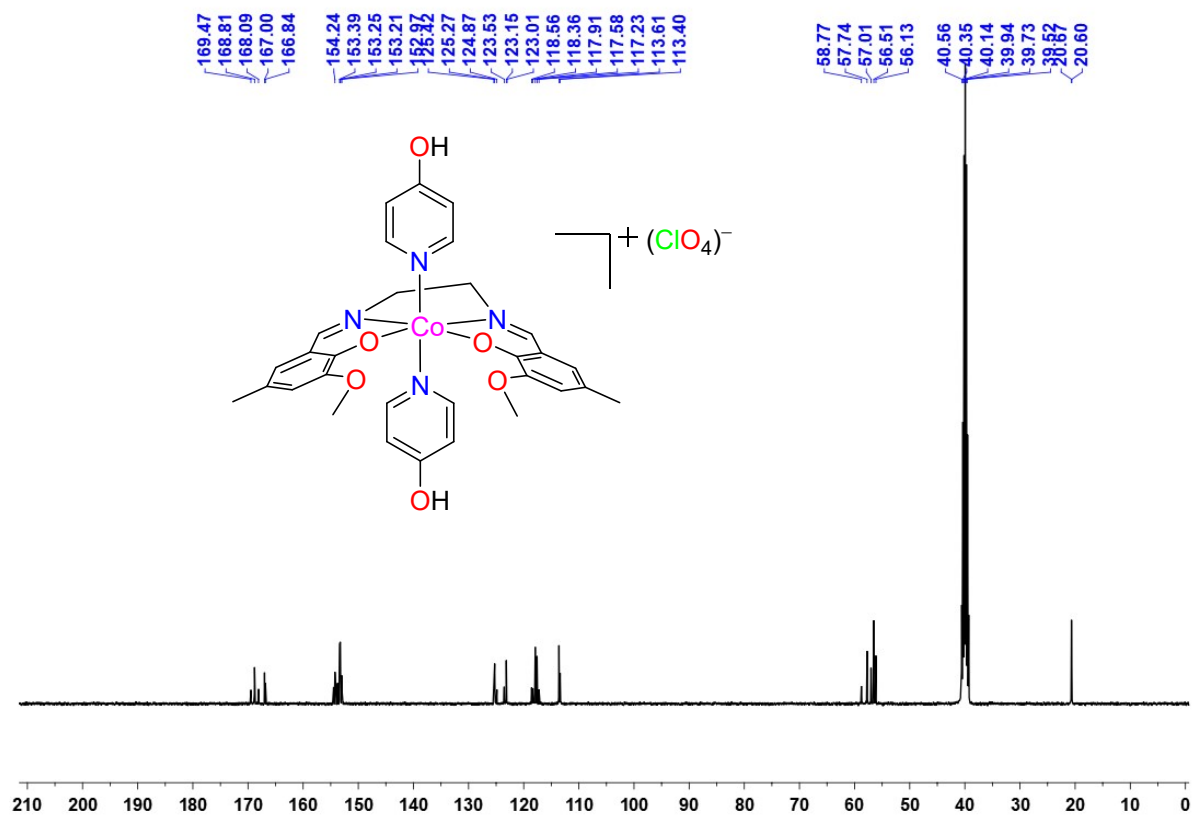

Fig. S13.  $^{13}\text{C NMR}$  of Complex **5** in  $\text{DMSO-d}_6$  at r.t.



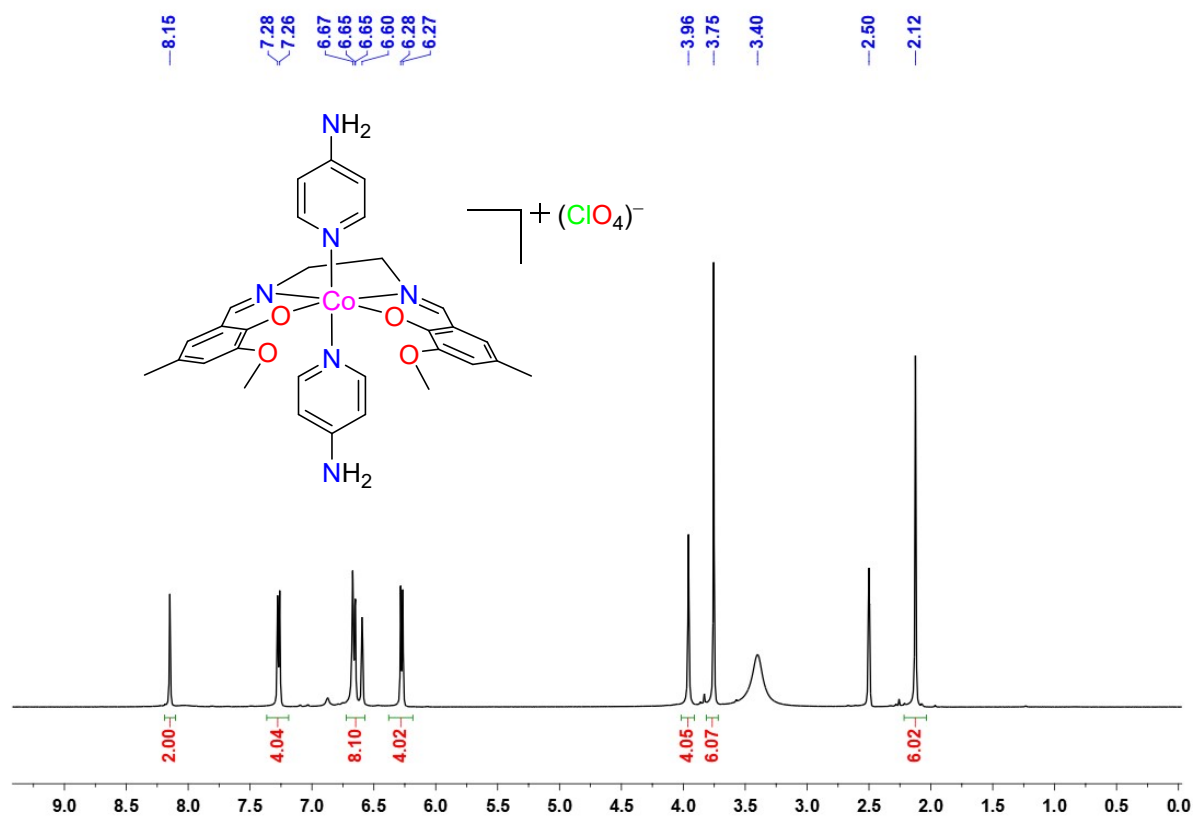

Fig. S14.  $^1\text{H NMR}$  of Complex 6 in  $\text{DMSO-d}_6$  at r.t.

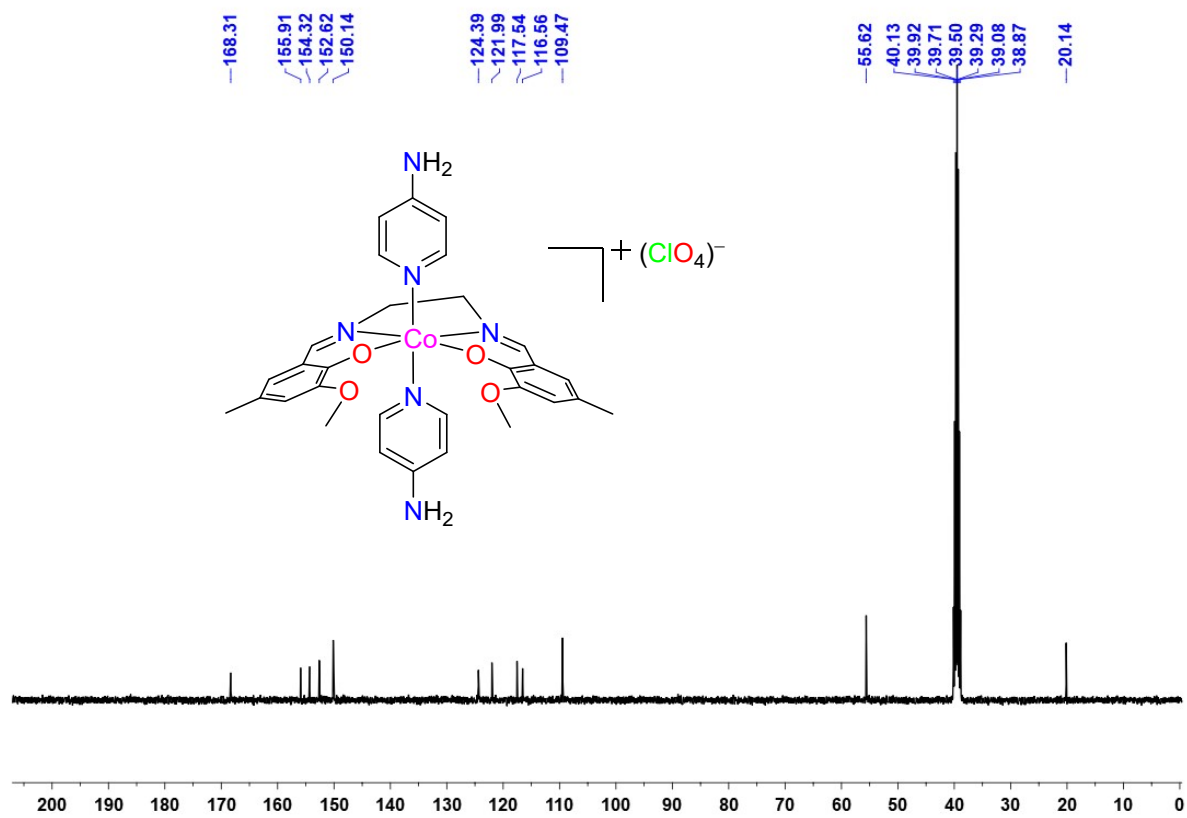

Fig. S15.  $^{13}\text{C NMR}$  of Complex 6 in  $\text{DMSO-d}_6$  at r.t.

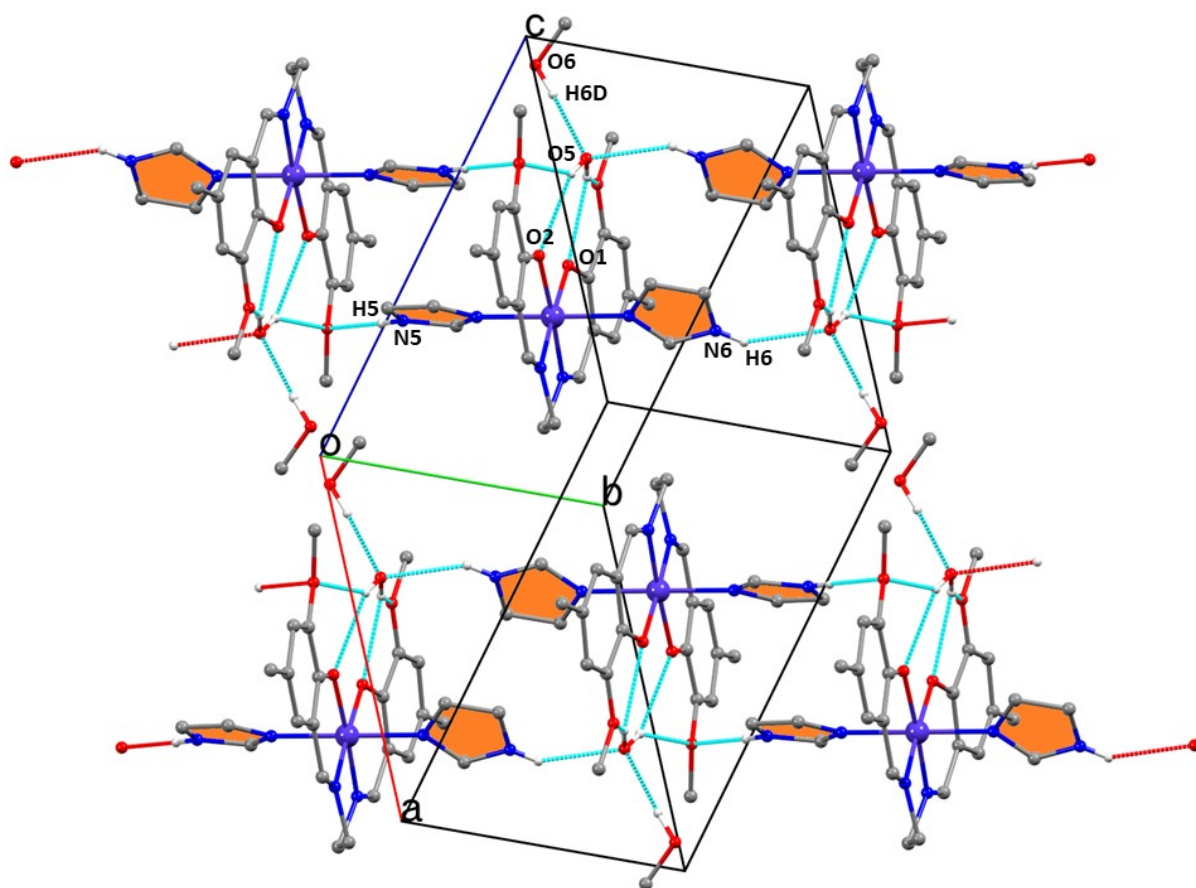

Fig. S16. A part of crystal packing showing hydrogen bonding interaction in 1.

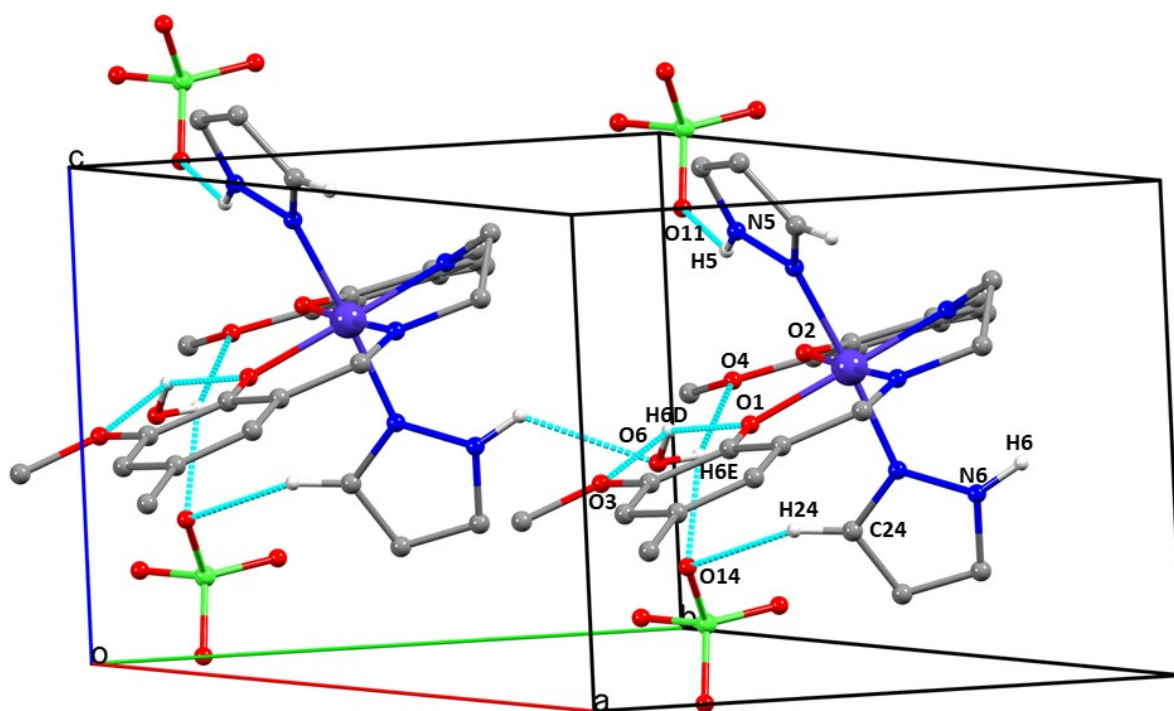

Fig. S17. A part of crystal packing showing hydrogen bonding interaction in 2.

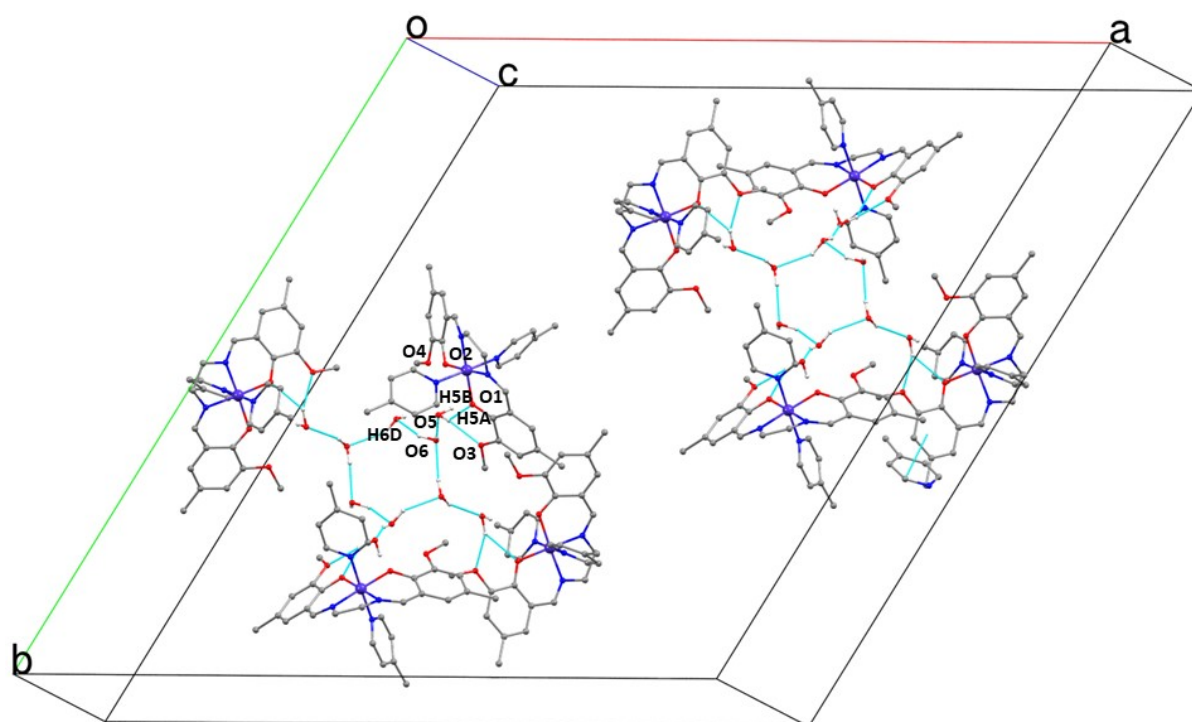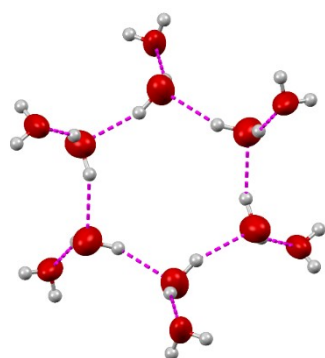

**Fig. S18.** Packing diagram of **4** showing inclusion of dodecameric water cluster.

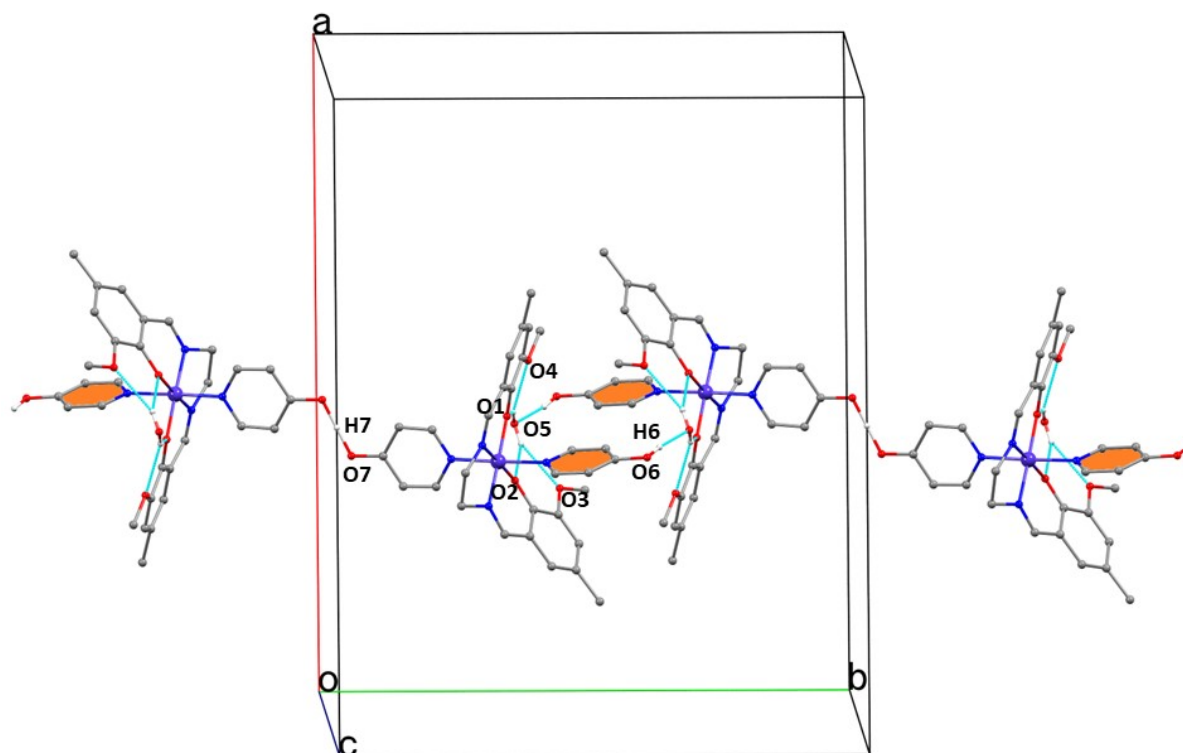

**Fig. S19.** A part of crystal packing showing hydrogen bonding interaction in **5**.

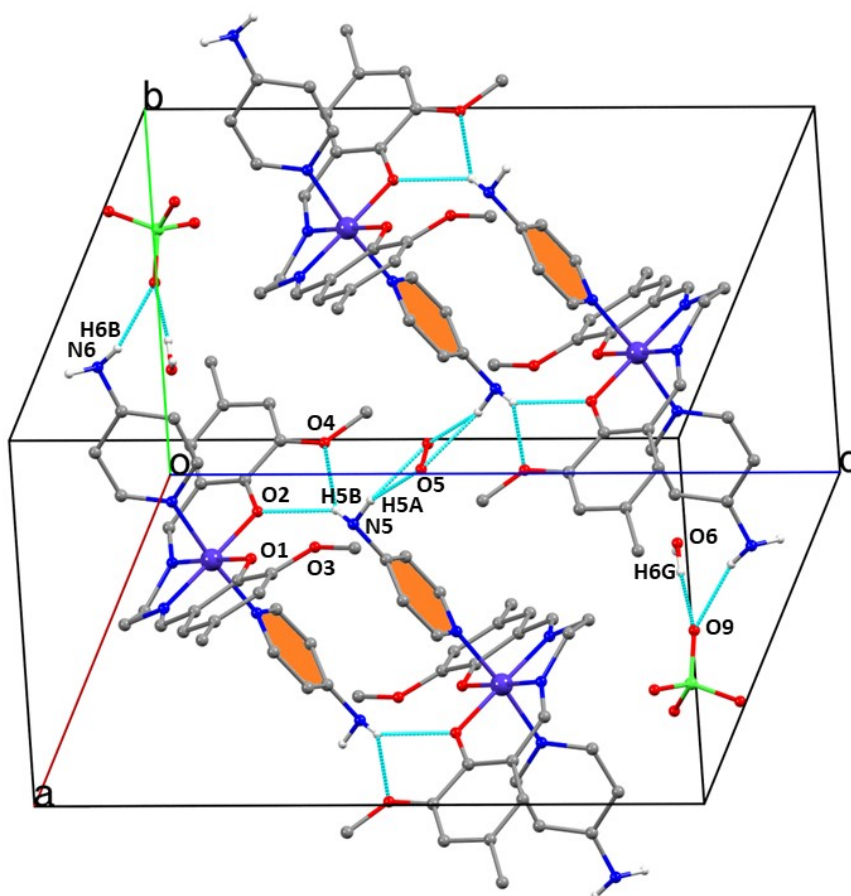

**Fig. S20.** A part of crystal packing showing hydrogen bonding interaction in **6**.

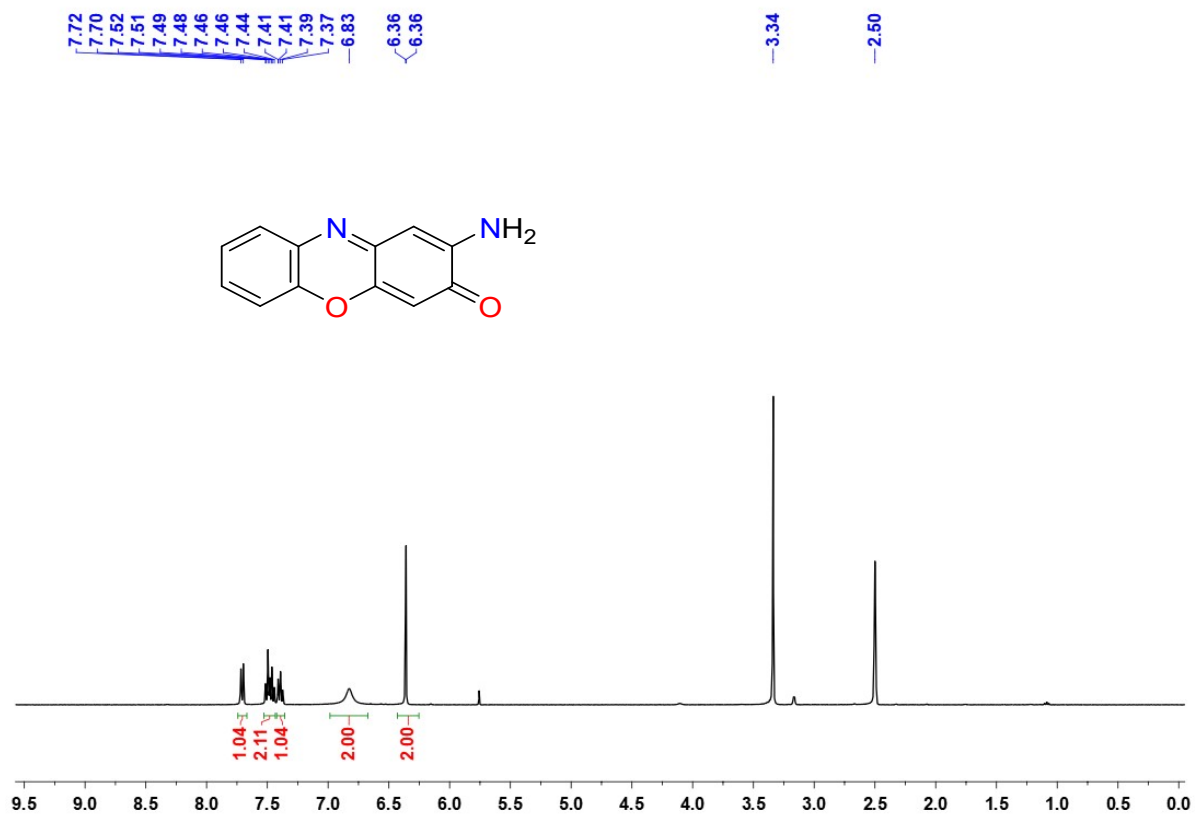

Fig. S21. <sup>1</sup>H NMR of the catalytic product PHX in DMSO-d<sub>6</sub> at r.t.

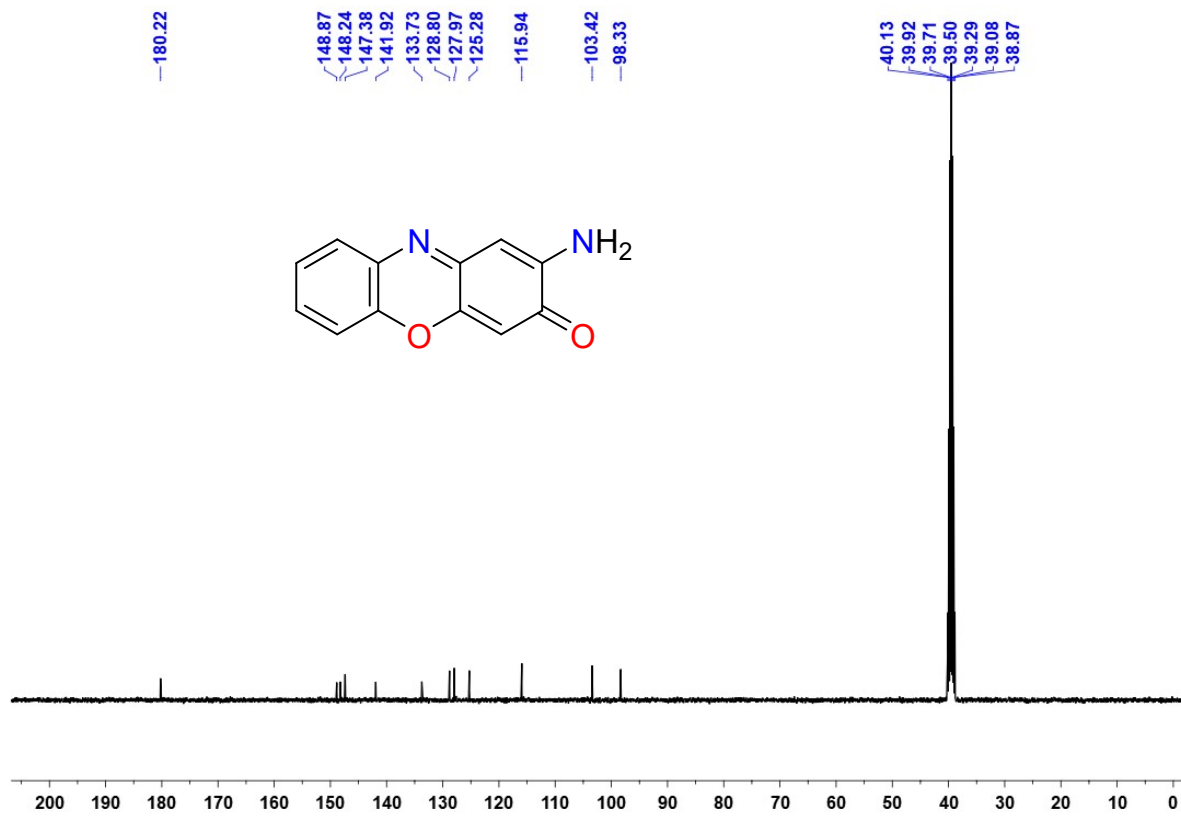

Fig. S22. <sup>13</sup>C NMR of the catalytic product PHX in DMSO-d<sub>6</sub> at r.t.

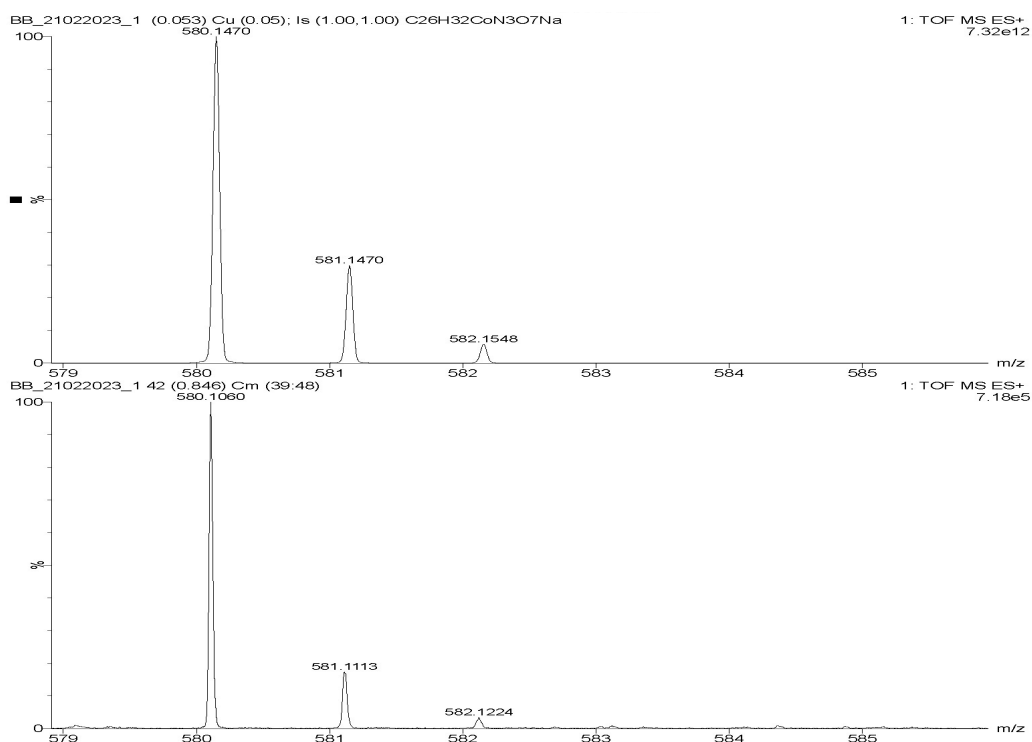

**Fig. S23.** HR-MS of the species B ( $m/z = [M_B + 2H_2O + Na]^+ = 580.1470$ ); calculated  $m/z = 580.1848$  for C<sub>26</sub>H<sub>32</sub>CoN<sub>3</sub>O<sub>7</sub>Na) which is a 1 : 1 complex–substrate aggregate of a monocationic species of composition [Co<sup>III</sup>(L)(OAP)(H<sub>2</sub>O)<sub>2</sub>Na]<sup>+</sup>.

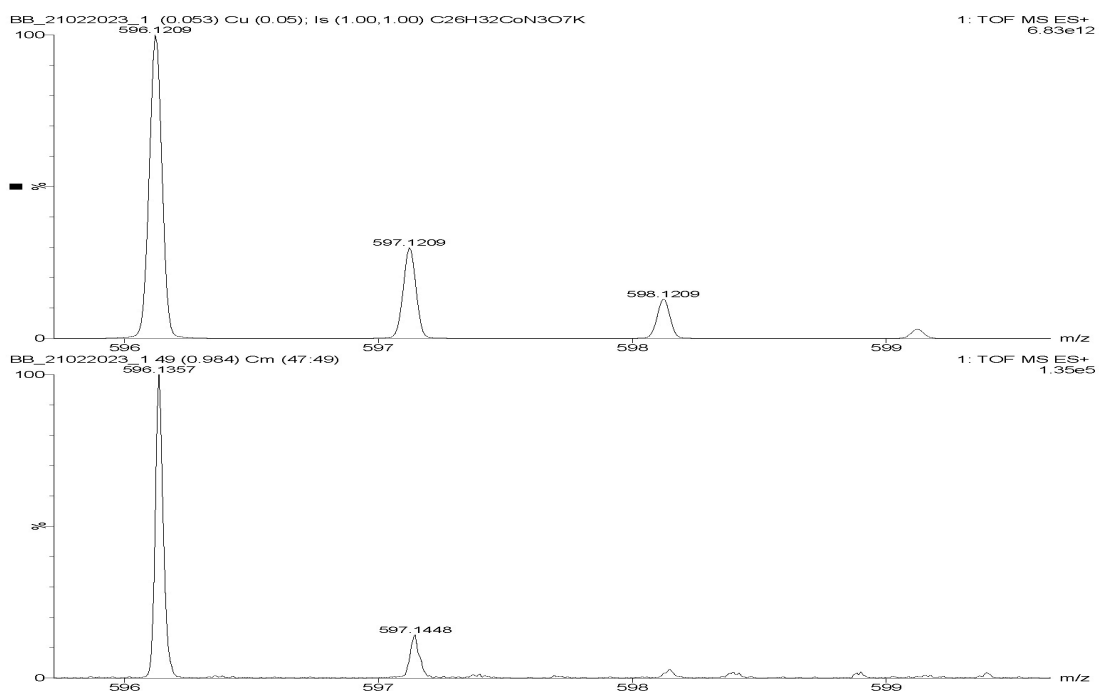

**Fig. S24.** HR-MS of the intermediate B ( $m/z = [M_B + 2H_2O + K]^+ = 596.1357$ ); calculated  $m/z = 596.1209$  for C<sub>26</sub>H<sub>32</sub>CoN<sub>3</sub>O<sub>7</sub>K) for the cationic species [Co<sup>III</sup>(L)(OAP)(H<sub>2</sub>O)<sub>2</sub>K]<sup>+</sup>

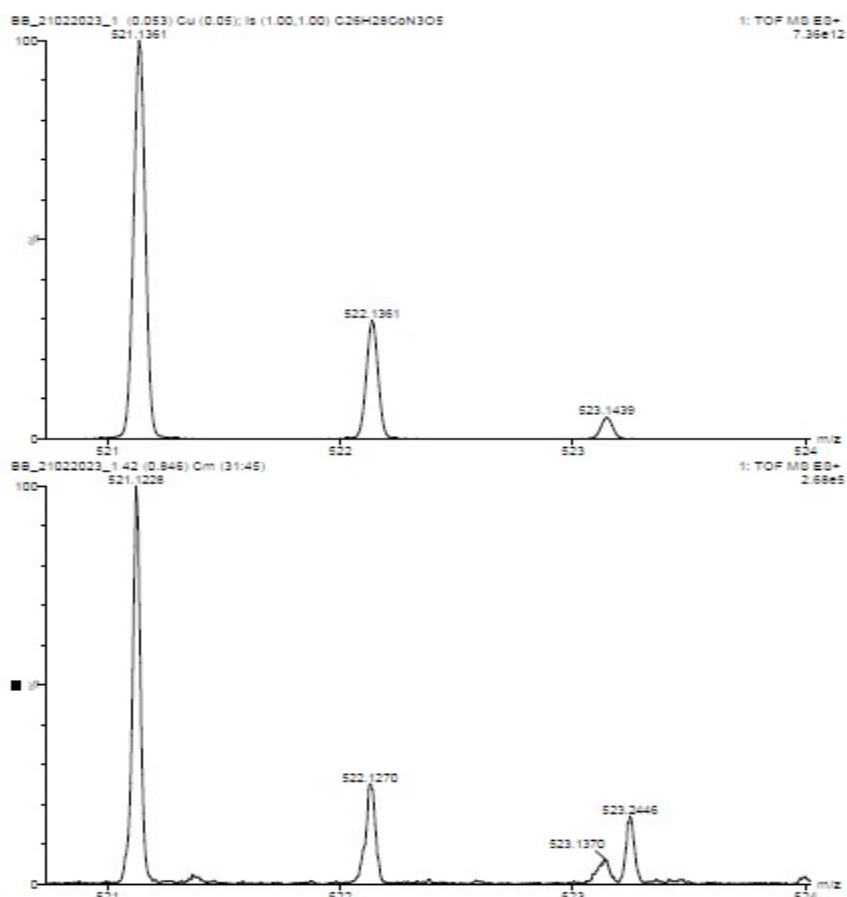

**Fig. S25.** HR-MS of the species C ( $M_C - H_2O$ )<sup>+</sup> calculated  $m/z = 520.1194$  for  $C_{26}H_{27}CoN_3O_5$ .

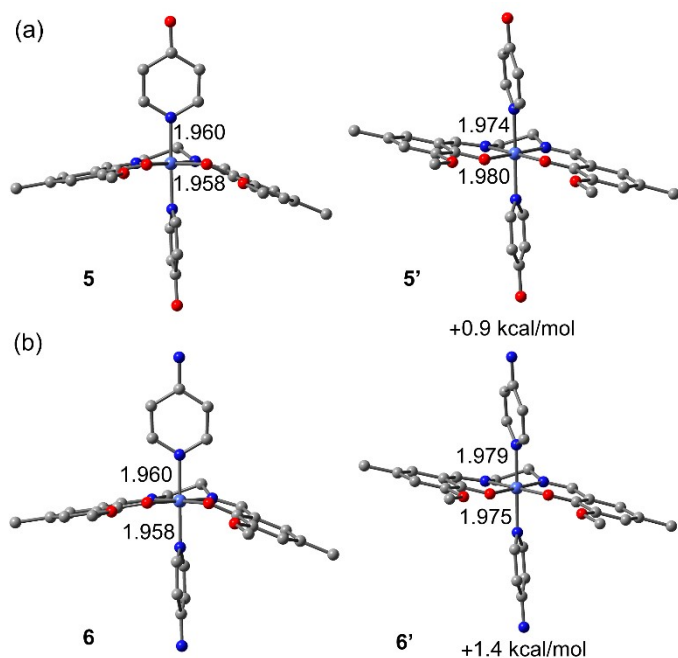

**Fig. S26** Optimized structures of compounds **5** and **5'** (a) and **6** and **6'** (b) at the RI-BP86-D4/def2-TZVP level of theory. Distances in Å

**Table S1:** Selected bond distances (Å) for complexes 1–4

| Bonds distances | 1          | 2          | 3           | 4          | 5          |            | 6          |  |
|-----------------|------------|------------|-------------|------------|------------|------------|------------|--|
|                 |            |            |             |            | Co1        | Co1'       |            |  |
| Co–O1           | 1.9107(11) | 1.899(2)   | 1.8982(13)  | 1.8960(2)  | 1.911(3)   | 1.901(3)   | 1.9026(17) |  |
| Co–O2           | 1.9013(12) | 1.906(2)   | 1.8900(14)  | 1.8992(2)  | 1.892(3)   | 1.901(3)   | 1.8958(16) |  |
| Co–N1           | 1.8996(14) | 1.884(3)   | 1.8818(17)  | 1.886(2)   | 1.889(4)   | 1.889(4)   | 1.900(2)   |  |
| Co–N2           | 1.8883(14) | 1.897(3)   | 1.8928(17)  | 1.887(2)   | 1.887(4)   | 1.887(4)   | 1.8857(19) |  |
| Co–N3           | 1.9546(14) | 1.935(3)   | 1.9774(17)  | 1.962(2)   | 1.966(3)   | 1.996(3)   | 1.9543(19) |  |
| Co–N4           | 1.9498(14) | 1.933(3)   | 1.9632(17)  | 1.962(2)   | 1.976(3)   | 1.976(3)   | 1.9699(19) |  |
|                 |            |            | Bond Angles |            |            |            |            |  |
|                 | 1          | 2          | 3           | 4          | 5          |            | 6          |  |
|                 |            |            |             |            | Co1        | Co1'       |            |  |
| O1–Co–N3        | 90.98(6)   | 88.34(10)  | 88.48(6)    | 89.55(10)  | 89.71(13)  | 89.66(12)  | 87.47(16)  |  |
| O1–Co–N4        | 89.03(6)   | 89.19(10)  | 88.80(6)    | 89.34(9)   | 88.25(13)  | 89.66(12)  | 86.95(16)  |  |
| O2–Co–O1        | 86.01(5)   | 86.63(9)   | 87.21(6)    | 88.51(9)   | 88.15(11)  | 89.35(12)  | 88.46(14)  |  |
| O2–Co–N3        | 88.89(6)   | 89.57(10)  | 89.49(7)    | 89.34(10)  | 88.33(12)  | 88.95(13)  | 88.29(16)  |  |
| O2–Co–N4        | 90.78(6)   | 87.31(10)  | 88.40(7)    | 88.49(10)  | 88.82(12)  | 88.60(13)  | 88.26(16)  |  |
| N1–Co–O1        | 94.03(6)   | 93.13(11)  | 93.47(6)    | 93.94(10)  | 92.97(14)  | 92.09(13)  | 94.23(16)  |  |
| N1–Co–O2        | 177.60(6)  | 179.44(11) | 179.15(7)   | 177.52(10) | 178.79(14) | 178.43(13) | 177.28(17) |  |
| N1–Co–N3        | 88.71(6)   | 90.93(11)  | 90.03(7)    | 91.09(11)  | 91.20(14)  | 90.44(14)  | 91.43(18)  |  |
| N1–Co–N4        | 91.63(6)   | 92.18(11)  | 92.11(7)    | 91.12(11)  | 91.68(13)  | 92.05(14)  | 92.28(18)  |  |
| N2–Co–O1        | 177.25(5)  | 177.70(11) | 178.08(7)   | 178.11(10) | 177.23(14) | 176.39(14) | 178.22(17) |  |
| N2–Co–O2        | 94.69(6)   | 95.58(11)  | 94.69(7)    | 93.34(10)  | 94.33(13)  | 94.06(15)  | 93.31(17)  |  |
| N2–Co–N1        | 85.39(6)   | 84.66(12)  | 84.62(7)    | 84.21(11)  | 84.56(16)  | 84.50(16)  | 84.00(19)  |  |
| N2–Co–N3        | 91.70(6)   | 92.34(11)  | 90.95(7)    | 90.07(10)  | 91.59(13)  | 91.57(14)  | 92.75(19)  |  |
| N2–Co–N4        | 88.30(6)   | 90.25(11)  | 91.83(7)    | 91.11(10)  | 90.58(13)  | 89.93(14)  | 92.93(19)  |  |
| N3–Co–N4        | 179.66(6)  | 176.13(11) | 176.64(7)   | 177.59(11) | 176.54(13) | 177.21(14) | 173.52(17) |  |

**Table S2:** Hydrogen Bonds for complex-1.

| D  | H   | A               | d(D-H)/Å | d(H-A)/Å | d(D-A)/Å | D-H-A/° |
|----|-----|-----------------|----------|----------|----------|---------|
| N5 | H5  | O5 <sup>1</sup> | 0.78(3)  | 2.21(3)  | 2.856(2) | 141(3)  |
| O6 | H6D | O5              | 0.91(5)  | 1.89(5)  | 2.793(3) | 174(4)  |
| O5 | H5A | O3              | 0.78(3)  | 2.18(3)  | 2.851(2) | 144(3)  |
| O5 | H5B | O4              | 0.80(4)  | 2.13(4)  | 2.847(2) | 150(3)  |

<sup>1</sup>1-X,1-Y,2-Z



**Table S3:** Hydrogen Bonds for complex-2.

| D  | H   | A               | d(D-H)/Å  | d(H-A)/Å  | d(D-A)/Å  | D-H-A/° |
|----|-----|-----------------|-----------|-----------|-----------|---------|
| O6 | H6D | O3              | 0.87      | 2.04      | 2.880(5)  | 161.1   |
| O5 | H5A | O2              | 0.87      | 2.10      | 2.816(4)  | 139.3   |
| O5 | H5B | O3              | 0.87      | 2.07      | 2.794(6)  | 139.7   |
| O7 | H7A | O9              | 0.87      | 1.69      | 2.289(11) | 124.0   |
| N5 | H5  | O6 <sup>1</sup> | 0.916(10) | 1.916(14) | 2.818(5)  | 168(4)  |

<sup>1</sup>1+X,+Y,+Z**Table S4:** Hydrogen Bonds for complex-3.

| D  | H   | A               | d(D-H)/Å | d(H-A)/Å | d(D-A)/Å | D-H-A/°  |
|----|-----|-----------------|----------|----------|----------|----------|
| O5 | H5A | O9 <sup>1</sup> | 0.898(7) | 1.945(3) | 2.834(7) | 170.4(5) |

<sup>1</sup>2-X,1-Y,-Z**Table S5:** Hydrogen Bonds for complex-4.

| D  | H   | A               | d(D-H)/Å  | d(H-A)/Å | d(D-A)/Å  | D-H-A/°  |
|----|-----|-----------------|-----------|----------|-----------|----------|
| O5 | H5A | O2              | 0.85      | 2.37     | 3.072(4)  | 140.9    |
| O5 | H5A | O4              | 0.85      | 2.12     | 2.873(4)  | 147.8    |
| O6 | H6D | O5              | 0.833(11) | 2.330(5) | 3.132(12) | 161.7(6) |
| O6 | H6E | O6 <sup>5</sup> | 0.918(9)  | 2.144(9) | 2.919(10) | 141.5(5) |
| O5 | H5B | O1              | 0.960(4)  | 2.254(2) | 3.071(5)  | 142.5(2) |
| O5 | H5B | O3              | 0.960(4)  | 2.128(3) | 2.870(5)  | 133.1(3) |

<sup>1</sup>1/3+Y,2/3-X+Y,2/3-Z; <sup>2</sup>1/3-Y+X,-1/3+X,2/3-Z; <sup>3</sup>4/3+Y-X,5/3-X,-1/3+Z; <sup>4</sup>2/3+Y,4/3-X+Y,4/3-Z; <sup>5</sup>1/3+Y,2/3-X+Y,5/3-Z**Table S6:** Hydrogen Bonds for complex-5.

| D   | H    | A               | d(D-H)/Å | d(H-A)/Å | d(D-A)/Å | D-H-A/° |
|-----|------|-----------------|----------|----------|----------|---------|
| O7  | H7A  | O2              | 0.85     | 2.08     | 2.805(5) | 143.4   |
| O7  | H7B  | O1              | 0.85     | 2.10     | 2.825(4) | 143.0   |
| O13 | H13  | O14             | 0.82     | 1.80     | 2.594(5) | 161.0   |
| O6  | H6   | O7 <sup>1</sup> | 0.82     | 1.78     | 2.590(5) | 171.8   |
| O14 | H14A | O8 <sup>4</sup> | 0.85     | 2.24     | 2.795(4) | 123.3   |
| O14 | H14B | O9 <sup>4</sup> | 0.85     | 2.00     | 2.810(4) | 157.7   |

<sup>1</sup>1-X,1-Y,2-Z; <sup>2</sup>1-X,-Y,2-Z; <sup>3</sup>-X,-Y,2-Z; <sup>4</sup>-X,1-Y,2-Z**Table S7:** Hydrogen Bonds for complex-6.

| D  | H   | A                | d(D-H)/Å | d(H-A)/Å | d(D-A)/Å  | D-H-A/° |
|----|-----|------------------|----------|----------|-----------|---------|
| N5 | H5A | O2 <sup>1</sup>  | 0.88     | 2.21     | 2.928(3)  | 138.6   |
| N5 | H5A | O4 <sup>1</sup>  | 0.88     | 2.24     | 3.023(3)  | 147.8   |
| N5 | H5B | O5 <sup>2</sup>  | 0.88     | 2.15     | 2.996(16) | 160.7   |
| N5 | H5B | O5 <sup>1</sup>  | 0.88     | 2.28     | 3.098(17) | 154.9   |
| N6 | H6B | O9 <sup>3</sup>  | 0.88     | 2.11     | 2.939(3)  | 157.2   |
| O6 | H6F | O10 <sup>4</sup> | 0.87     | 2.02     | 2.744(12) | 139.9   |
| O6 | H6G | O9 <sup>5</sup>  | 0.87     | 2.01     | 2.865(11) | 168.2   |

<sup>1</sup>2-X,1-Y,1-Z; <sup>2</sup>1+X,+Y,+Z; <sup>3</sup>-1+X,3/2-Y,-1/2+Z; <sup>4</sup>+X,3/2-Y,-1/2+Z; <sup>5</sup>2-X,-1/2+Y,1/2-Z

## Cartesian coordinates

### Geometries of 1-6 and 1'-6'

1

|    |             |             |             |
|----|-------------|-------------|-------------|
| Co | 0.47865350  | -0.81867950 | 8.11040930  |
| O  | -0.33683520 | -2.16359600 | 9.18010830  |
| O  | -1.92055210 | -3.85613500 | 10.33666150 |
| O  | -1.22051600 | 0.04970030  | 8.17826460  |
| O  | -3.51523350 | 1.01011260  | 8.91032070  |
| N  | 2.17006310  | -1.66420870 | 8.04166460  |
| N  | 1.27620950  | 0.52005950  | 7.03653360  |
| N  | 0.88659890  | 0.15489740  | 9.74358400  |
| N  | 1.59185690  | 1.59086570  | 11.24026230 |
| H  | 2.13029300  | 2.33481810  | 11.67052610 |
| N  | -0.15998930 | -1.83662520 | 6.58040380  |
| N  | -1.65382180 | -2.84268100 | 5.33923880  |
| H  | -2.55710820 | -3.12985920 | 4.97819390  |
| C  | 0.17354430  | -3.34331260 | 9.40102650  |
| C  | -0.66910030 | -4.31196190 | 10.04852680 |
| C  | -2.80745360 | -4.75875730 | 10.99722080 |
| H  | -3.00127670 | -5.65311900 | 10.38275660 |
| H  | -3.74120210 | -4.20559970 | 11.14206810 |
| H  | -2.40764520 | -5.06972290 | 11.97586680 |
| C  | -0.19630020 | -5.58227400 | 10.33327610 |
| H  | -0.85330870 | -6.30226660 | 10.82131500 |
| C  | 1.12613270  | -5.98709910 | 10.01075200 |
| C  | 1.58539290  | -7.38019010 | 10.34948720 |
| H  | 2.62484910  | -7.54312090 | 10.03749500 |
| H  | 0.96168950  | -8.14004330 | 9.85452770  |
| H  | 1.52508620  | -7.56918050 | 11.43198830 |
| C  | 1.94992130  | -5.07142450 | 9.39585320  |
| H  | 2.97486380  | -5.34593730 | 9.13698980  |
| C  | 1.50276800  | -3.75536690 | 9.08078570  |
| C  | 2.42752400  | -2.86974390 | 8.46425830  |
| H  | 3.45154550  | -3.24479670 | 8.32709120  |
| C  | 3.21791880  | -0.82349980 | 7.46252430  |
| H  | 4.00843240  | -1.43373620 | 6.99986530  |
| H  | 3.68554310  | -0.22277160 | 8.26057190  |
| C  | 2.54296380  | 0.09414030  | 6.44487620  |
| H  | 3.17598300  | 0.95779850  | 6.18904890  |
| H  | 2.33667570  | -0.45980930 | 5.51470330  |
| C  | 0.78643130  | 1.70758010  | 6.82206070  |
| H  | 1.38807720  | 2.40261980  | 6.21956790  |
| C  | -0.46229780 | 2.19090510  | 7.30395390  |
| C  | -1.39667800 | 1.32204240  | 7.94403210  |
| C  | -2.65561550 | 1.89522850  | 8.33370380  |
| C  | -4.78529450 | 1.51084770  | 9.32812570  |
| H  | -4.67408300 | 2.29937190  | 10.09001030 |
| H  | -5.31399940 | 0.65580280  | 9.76175180  |
| H  | -5.36074980 | 1.90695660  | 8.47549360  |
| C  | -2.91867700 | 3.23798320  | 8.11547720  |
| H  | -3.87569910 | 3.65499710  | 8.42942020  |
| C  | -1.98020850 | 4.10029970  | 7.49073410  |
| C  | -2.32299090 | 5.55069540  | 7.27799970  |
| H  | -2.53100920 | 6.05836700  | 8.23230580  |
| H  | -3.22106480 | 5.66202580  | 6.65180800  |
| H  | -1.50144350 | 6.08531070  | 6.78458860  |
| C  | -0.77683730 | 3.56344050  | 7.08932020  |
| H  | -0.03594610 | 4.19420500  | 6.59308390  |
| C  | 0.50184070  | -2.61725260 | 5.65335860  |
| H  | 1.57941030  | -2.69802280 | 5.62568450  |
| C  | -0.42409070 | -3.24954350 | 4.86474320  |
| H  | -0.31560800 | -3.93616760 | 4.03498110  |
| C  | -1.46488810 | -1.99515690 | 6.37630510  |
| H  | -2.24263870 | -1.52662850 | 6.96701590  |
| C  | 1.76110690  | 1.12882980  | 9.97892130  |
| H  | 2.48350260  | 1.52970250  | 9.28114110  |
| C  | 0.56089980  | 0.88718930  | 11.82938970 |
| H  | 0.23389640  | 1.07843300  | 12.84342790 |
| C  | 0.12552520  | -0.00452700 | 10.88516780 |
| H  | -0.67003670 | -0.73750910 | 10.91937930 |

**1'**

|    |             |             |            |
|----|-------------|-------------|------------|
| Co | 9.30823530  | 13.47771200 | 3.66427680 |
| O  | 9.65558230  | 12.49902580 | 5.26184560 |
| O  | 9.18694370  | 11.11515690 | 7.40978520 |
| O  | 8.02230470  | 14.43766830 | 4.68367280 |
| O  | 6.35065010  | 15.41241480 | 6.39779220 |
| N  | 10.59845450 | 12.52766270 | 2.66288670 |
| N  | 8.98324710  | 14.42575560 | 2.05100900 |
| C  | 10.09307660 | 11.27025840 | 5.24860820 |
| C  | 9.87379850  | 10.47488350 | 6.42676910 |
| C  | 8.94725250  | 10.39416990 | 8.61786720 |
| H  | 8.33849190  | 9.49348370  | 8.43499620 |
| H  | 8.39804910  | 11.08144530 | 9.26933650 |
| H  | 9.89227010  | 10.10263820 | 9.10405780 |
| C  | 10.33870520 | 9.17119920  | 6.49438060 |
| H  | 10.15215640 | 8.58140170  | 7.39223210 |
| C  | 11.05411120 | 8.56550040  | 5.42828450 |
| C  | 11.53610320 | 7.14610610  | 5.56439860 |
| H  | 12.08885300 | 6.82639450  | 4.67197930 |
| H  | 10.69595130 | 6.44972090  | 5.70888640 |
| H  | 12.20152080 | 7.03066510  | 6.43316110 |
| C  | 11.28352840 | 9.31330610  | 4.29461560 |
| H  | 11.83485510 | 8.88152580  | 3.45625180 |
| C  | 10.80735230 | 10.65017970 | 4.17609000 |
| C  | 11.09791370 | 11.36749430 | 2.98210040 |
| H  | 11.79937330 | 10.90346800 | 2.27411680 |
| C  | 11.00951430 | 13.25521960 | 1.46642220 |
| H  | 11.47593650 | 12.58392230 | 0.72906860 |
| H  | 11.74855810 | 14.02081690 | 1.75194970 |
| C  | 9.75812430  | 13.93001750 | 0.90934010 |
| H  | 10.01263960 | 14.74604640 | 0.21686180 |
| H  | 9.15265020  | 13.19605830 | 0.35044610 |
| C  | 8.12024760  | 15.38994490 | 1.89727880 |
| H  | 8.04250640  | 15.84567040 | 0.90008490 |
| C  | 7.26268950  | 15.91653420 | 2.90304240 |
| C  | 7.25830440  | 15.39069260 | 4.23241780 |
| C  | 6.32334640  | 15.97384340 | 5.15910330 |
| C  | 5.44504160  | 15.93073390 | 7.37187510 |
| H  | 5.63956660  | 16.99681870 | 7.57306690 |
| H  | 5.62363550  | 15.34894650 | 8.28176320 |
| H  | 4.39758090  | 15.80488960 | 7.05251250 |
| C  | 5.48991800  | 17.00679390 | 4.76562460 |
| H  | 4.78813060  | 17.43190770 | 5.48362790 |
| C  | 5.50973630  | 17.53593200 | 3.44717690 |
| C  | 4.58089910  | 18.66240790 | 3.08038590 |
| H  | 4.70868060  | 18.95825580 | 2.03128250 |
| H  | 4.76079280  | 19.55032640 | 3.70558370 |
| H  | 3.52773520  | 18.37661110 | 3.22388990 |
| C  | 6.38786540  | 16.98449970 | 2.54264020 |
| H  | 6.42151890  | 17.35813560 | 1.51667070 |
| C  | 12.45040780 | 15.62276470 | 5.22163100 |
| C  | 11.83742620 | 14.45415820 | 4.85064550 |
| C  | 10.52191720 | 16.08329730 | 4.21915090 |
| N  | 11.60535120 | 16.63530840 | 4.81502930 |
| H  | 11.75452460 | 17.62894130 | 4.95335670 |
| H  | 13.38427200 | 15.81561300 | 5.73381710 |
| H  | 12.15200980 | 13.43154640 | 5.01030270 |
| H  | 9.68209420  | 16.64549010 | 3.82786920 |
| N  | 10.64459070 | 14.75963020 | 4.22739430 |
| C  | 6.96792180  | 11.86119260 | 4.25608670 |
| C  | 6.20346440  | 10.82657180 | 3.78539760 |
| C  | 7.76273760  | 11.32875720 | 2.28819310 |
| N  | 7.92925000  | 12.16190700 | 3.31043380 |
| H  | 6.92278470  | 12.40662130 | 5.18991810 |
| H  | 5.35998610  | 10.30158350 | 4.21501410 |
| H  | 8.36772240  | 11.27825200 | 1.39296070 |
| N  | 6.71821600  | 10.50648250 | 2.54496170 |
| H  | 6.37957710  | 9.77636540  | 1.92791150 |

**2**

|    |            |            |            |
|----|------------|------------|------------|
| Co | 0.5575904  | -0.7568393 | 8.3079765  |
| O  | -0.2550553 | -2.0813162 | 9.3980570  |
| O  | -1.9581641 | -3.8070435 | 10.3280251 |
| O  | -1.1417446 | 0.1287416  | 8.3773073  |
| O  | -3.5397410 | 1.0145628  | 8.7930387  |
| N  | 2.2253433  | -1.6336597 | 8.2259792  |
| N  | 1.3663478  | 0.5669210  | 7.2089181  |
| N  | 1.0942497  | 0.1554805  | 9.9218642  |

|           |            |            |            |
|-----------|------------|------------|------------|
| N         | -0.1298291 | -1.7587172 | 6.8037577  |
| C         | 0.1728978  | -3.3132803 | 9.4709941  |
| C         | -0.7306484 | -4.2952668 | 10.0050674 |
| C         | -2.8972677 | -4.7216587 | 10.8950724 |
| H         | -3.1348737 | -5.5390972 | 10.1949209 |
| H         | -3.7999087 | -4.1347051 | 11.0933143 |
| H         | -2.5200674 | -5.1466909 | 11.8389293 |
| C         | -0.3295767 | -5.6137821 | 10.1520764 |
| H         | -1.0312795 | -6.3442904 | 10.5545687 |
| C         | 0.9699499  | -6.0572663 | 9.7907679  |
| C         | 1.3445937  | -7.5032984 | 9.9760254  |
| H         | 2.3754105  | -7.6922650 | 9.6509527  |
| H         | 0.6817492  | -8.1660098 | 9.3992041  |
| H         | 1.2634648  | -7.8049204 | 11.0311336 |
| C         | 1.8493802  | -5.1314306 | 9.2757323  |
| H         | 2.8562431  | -5.4363414 | 8.9829335  |
| C         | 1.4762717  | -3.7675458 | 9.0999953  |
| C         | 2.4431589  | -2.8722956 | 8.5680597  |
| H         | 3.4612642  | -3.2614033 | 8.4293420  |
| C         | 3.2947053  | -0.7516986 | 7.7642052  |
| H         | 4.1425379  | -1.3282543 | 7.3649910  |
| H         | 3.6538353  | -0.1478880 | 8.6134826  |
| C         | 2.6813420  | 0.1613198  | 6.7070131  |
| H         | 3.3166348  | 1.0356006  | 6.5019219  |
| H         | 2.5441864  | -0.3917818 | 5.7635410  |
| C         | 0.8567188  | 1.7218456  | 6.9047374  |
| H         | 1.4672606  | 2.4055672  | 6.2991464  |
| C         | -0.4380096 | 2.1933252  | 7.2887655  |
| C         | -1.3738007 | 1.3499937  | 7.9612619  |
| C         | -2.6834536 | 1.8883022  | 8.2013884  |
| C         | -4.8610042 | 1.4811572  | 9.0808728  |
| H         | -4.8377540 | 2.3368637  | 9.7738855  |
| H         | -5.3747456 | 0.6395146  | 9.5556956  |
| H         | -5.3930068 | 1.7682390  | 8.1596002  |
| C         | -2.9895823 | 3.1894243  | 7.8328441  |
| H         | -3.9857639 | 3.5827615  | 8.0354399  |
| C         | -2.0480090 | 4.0347902  | 7.1909647  |
| C         | -2.4368157 | 5.4397690  | 6.8164107  |
| H         | -2.7067216 | 6.0304201  | 7.7049685  |
| H         | -3.3101943 | 5.4473929  | 6.1475270  |
| H         | -1.6158498 | 5.9573334  | 6.3047618  |
| C         | -0.7971600 | 3.5234908  | 6.9210529  |
| H         | -0.0548083 | 4.1370129  | 6.4065763  |
| C         | 0.3775086  | -2.5408632 | 5.8376632  |
| H         | 1.4482239  | -2.6145328 | 5.6931905  |
| C         | -0.6626985 | -3.1882884 | 5.1543956  |
| H         | -0.5768323 | -3.8768846 | 4.3229275  |
| C         | 1.7545111  | 0.6650004  | 12.0102644 |
| H         | 2.1462412  | 0.5700226  | 13.0154087 |
| C         | 1.6225025  | -0.3477867 | 11.0467617 |
| H         | 1.8620891  | -1.4027495 | 11.1106504 |
| C         | -1.8299874 | -2.7578718 | 5.7743157  |
| H         | -2.8722434 | -2.9900303 | 5.5879644  |
| C         | 1.2662125  | 1.8136457  | 11.4049815 |
| H         | 1.1584676  | 2.8307509  | 11.7642901 |
| N         | -1.4669360 | -1.9069728 | 6.7550018  |
| N         | 0.8878359  | 1.4702746  | 10.1520117 |
| H         | -2.0037590 | -1.3725232 | 7.4471198  |
| H         | 0.4161364  | 2.0368180  | 9.4453831  |
| <b>2'</b> |            |            |            |
| Co        | 9.0644640  | 13.3130184 | 3.6116014  |
| O         | 9.3669284  | 12.2926352 | 5.1907598  |
| O         | 9.1948066  | 10.9905917 | 7.4269624  |
| O         | 7.7400017  | 14.2351509 | 4.6208684  |
| O         | 6.2520198  | 15.3463061 | 6.4283884  |
| N         | 10.3979882 | 12.4100980 | 2.6073616  |
| N         | 8.7560251  | 14.3135174 | 2.0287246  |
| C         | 10.0417244 | 11.1808395 | 5.2467410  |
| C         | 9.9714626  | 10.4238364 | 6.4726913  |
| C         | 9.0696030  | 10.2989068 | 8.6715835  |
| H         | 8.6169391  | 9.3039301  | 8.5311135  |
| H         | 8.4102583  | 10.9180376 | 9.2876470  |
| H         | 10.0470365 | 10.1916899 | 9.1686372  |
| C         | 10.6581223 | 9.2272065  | 6.5999547  |
| H         | 10.5851824 | 8.6677039  | 7.5325913  |
| C         | 11.4620492 | 8.6935669  | 5.5562519  |
| C         | 12.1863158 | 7.3911766  | 5.7647918  |

|   |            |            |           |
|---|------------|------------|-----------|
| H | 12.7648684 | 7.1105985  | 4.8759646 |
| H | 11.4839309 | 6.5730650  | 5.9843015 |
| H | 12.8822227 | 7.4541485  | 6.6149094 |
| C | 11.5513860 | 9.4023368  | 4.3803895 |
| H | 12.1651607 | 9.0282451  | 3.5584585 |
| C | 10.8538610 | 10.6353137 | 4.1982693 |
| C | 11.0267498 | 11.3284011 | 2.9637999 |
| H | 11.7535531 | 10.9066755 | 2.2556468 |
| C | 10.7087832 | 13.0990317 | 1.3550106 |
| H | 11.1397769 | 12.4069850 | 0.6165984 |
| H | 11.4441911 | 13.8937125 | 1.5614792 |
| C | 9.4072056  | 13.7184240 | 0.8615035 |
| H | 9.5820550  | 14.4690968 | 0.0770831 |
| H | 8.7518783  | 12.9313437 | 0.4531061 |
| C | 8.0181734  | 15.3808188 | 1.9269551 |
| H | 7.9608437  | 15.8667039 | 0.9432715 |
| C | 7.2707724  | 15.9789782 | 2.9838729 |
| C | 7.1611187  | 15.3449173 | 4.2654597 |
| C | 6.3269097  | 15.9988638 | 5.2437936 |
| C | 5.4284443  | 15.9195428 | 7.4463208 |
| H | 5.7901991  | 16.9187665 | 7.7373533 |
| H | 5.5007804  | 15.2399850 | 8.3010700 |
| H | 4.3791943  | 15.9896617 | 7.1172693 |
| C | 5.6849521  | 17.1872805 | 4.9373915 |
| H | 5.0630574  | 17.6672555 | 5.6934313 |
| C | 5.8020235  | 17.8125470 | 3.6661880 |
| C | 5.0727564  | 19.1014847 | 3.3998900 |
| H | 5.2526811  | 19.4575545 | 2.3778601 |
| H | 5.3916152  | 19.8927321 | 4.0952327 |
| H | 3.9868999  | 18.9787603 | 3.5286677 |
| C | 6.5837353  | 17.2019044 | 2.7133005 |
| H | 6.6893201  | 17.6475923 | 1.7219153 |
| C | 12.1854475 | 15.5465600 | 5.1847369 |
| C | 11.5912264 | 14.3346217 | 4.7990164 |
| H | 13.1475425 | 15.6853524 | 5.6620267 |
| H | 11.9542988 | 13.3195885 | 4.9078511 |
| N | 10.3940172 | 14.5675563 | 4.2409600 |
| C | 6.4373518  | 12.2891014 | 2.6703746 |
| C | 5.7658351  | 11.0735479 | 2.4652905 |
| N | 7.6941590  | 12.0563744 | 3.0776746 |
| H | 6.0785960  | 13.3055144 | 2.5597442 |
| H | 4.7430075  | 10.9337606 | 2.1381270 |
| N | 10.2171346 | 15.9062366 | 4.2634836 |
| N | 7.8338272  | 10.7143227 | 3.1337189 |
| C | 11.2728301 | 16.5305745 | 4.8340194 |
| H | 11.2928682 | 17.6085973 | 4.9461607 |
| C | 6.6888648  | 10.0870229 | 2.7797444 |
| H | 6.6193489  | 9.0051844  | 2.7799120 |
| H | 9.3280713  | 16.3011898 | 3.9508976 |
| H | 8.7020972  | 10.3137601 | 3.4946100 |

**3**

|    |             |             |            |
|----|-------------|-------------|------------|
| Co | 9.38257490  | 13.56979930 | 3.72650620 |
| O  | 9.69815880  | 12.56107660 | 5.30970160 |
| O  | 9.14729250  | 11.14686070 | 7.41891270 |
| O  | 8.12976710  | 14.56607810 | 4.74701490 |
| O  | 6.38411160  | 15.47453400 | 6.42851120 |
| N  | 10.65513050 | 12.60279250 | 2.72024510 |
| N  | 9.08728100  | 14.52397710 | 2.11029380 |
| N  | 7.93974060  | 12.30288340 | 3.34989040 |
| N  | 10.75779420 | 14.83259900 | 4.32017200 |
| C  | 10.08927970 | 11.31237930 | 5.27487340 |
| C  | 9.82825440  | 10.50415320 | 6.43266040 |
| C  | 8.86266240  | 10.40840300 | 8.60770850 |
| H  | 8.23162650  | 9.53049660  | 8.39348950 |
| H  | 8.32103540  | 11.09849390 | 9.26246980 |
| H  | 9.78909400  | 10.07925240 | 9.10505890 |
| C  | 10.24841960 | 9.18373830  | 6.47949380 |
| H  | 10.03371890 | 8.58410610  | 7.36433740 |
| C  | 10.95054760 | 8.57393480  | 5.40812450 |
| C  | 11.38289100 | 7.13669470  | 5.52061290 |
| H  | 11.92007330 | 6.81080460  | 4.62115040 |
| H  | 10.51942350 | 6.46840430  | 5.65892810 |
| H  | 12.04769550 | 6.98587380  | 6.38431630 |
| C  | 11.21219480 | 9.33416720  | 4.28908230 |
| H  | 11.75005040 | 8.89822520  | 3.44444670 |
| C  | 10.78506610 | 10.68858530 | 4.19434800 |
| C  | 11.11317810 | 11.42042030 | 3.01798950 |

|   |             |             |            |
|---|-------------|-------------|------------|
| H | 11.81140000 | 10.95099430 | 2.31090930 |
| C | 11.14363620 | 13.36071830 | 1.57136380 |
| H | 11.60279000 | 12.69765830 | 0.82249200 |
| H | 11.91525070 | 14.06609560 | 1.91877510 |
| C | 9.95983550  | 14.13362650 | 0.99228650 |
| H | 10.30130010 | 15.01782940 | 0.43396450 |
| H | 9.39681190  | 13.49898380 | 0.28793080 |
| C | 8.13242010  | 15.39153150 | 1.91903510 |
| H | 8.04120900  | 15.83164120 | 0.91629020 |
| C | 7.19516430  | 15.83769200 | 2.89131810 |
| C | 7.25549560  | 15.39806910 | 4.24943760 |
| C | 6.27381310  | 15.93401690 | 5.15322010 |
| C | 5.45914450  | 15.98396610 | 7.39022280 |
| H | 5.54196470  | 17.07896390 | 7.48320670 |
| H | 5.73187210  | 15.51487570 | 8.34102030 |
| H | 4.42195660  | 15.71690840 | 7.13025750 |
| C | 5.31568520  | 16.82734790 | 4.70353690 |
| H | 4.57344590  | 17.21339460 | 5.40260620 |
| C | 5.25840010  | 17.26063820 | 3.35235400 |
| C | 4.18921950  | 18.22943540 | 2.92321150 |
| H | 4.27423220  | 18.46814410 | 1.85552400 |
| H | 4.25273620  | 19.17242040 | 3.48675000 |
| H | 3.18344730  | 17.81753440 | 3.09728050 |
| C | 6.19590790  | 16.76631240 | 2.47454820 |
| H | 6.18258250  | 17.07797680 | 1.42784580 |
| C | 7.75852010  | 11.69509840 | 2.16276150 |
| H | 8.46407700  | 11.94334860 | 1.37502940 |
| C | 6.73505450  | 10.78117660 | 1.94692910 |
| H | 6.62954520  | 10.31627000 | 0.96781130 |
| C | 5.86665350  | 10.47933770 | 2.99542070 |
| H | 5.05507880  | 9.76510750  | 2.85598360 |
| C | 6.06048670  | 11.10888370 | 4.22332450 |
| H | 5.41136470  | 10.90625210 | 5.07394220 |
| C | 7.10399960  | 12.01545150 | 4.37113450 |
| H | 7.30528970  | 12.53349130 | 5.30624590 |
| C | 10.54973650 | 16.16173070 | 4.24335060 |
| H | 9.62159700  | 16.48744500 | 3.78077430 |
| C | 11.46627350 | 17.08015330 | 4.74260570 |
| H | 11.25115940 | 18.14466920 | 4.66153580 |
| C | 12.63572040 | 16.61652430 | 5.34342080 |
| H | 13.36914520 | 17.31478090 | 5.74649270 |
| C | 12.84251690 | 15.24015800 | 5.42514150 |
| H | 13.73460230 | 14.82569030 | 5.89237370 |
| C | 11.88226610 | 14.37784320 | 4.90860710 |
| H | 11.99243150 | 13.29868190 | 4.97339010 |

**3'**

|    |             |             |             |
|----|-------------|-------------|-------------|
| Co | 0.66031460  | -0.78984270 | 8.09044030  |
| O  | -0.16266130 | -2.15647670 | 9.12306650  |
| O  | -1.76661330 | -3.86031770 | 10.23454310 |
| O  | -1.02528450 | 0.08848210  | 8.17367980  |
| O  | -3.32855860 | 1.02976380  | 8.89534860  |
| N  | 2.34785510  | -1.64589580 | 8.00859780  |
| N  | 1.47717830  | 0.56953060  | 7.05534390  |
| N  | 1.03870370  | 0.16930610  | 9.77458690  |
| C  | 0.33446030  | -3.34895250 | 9.31821510  |
| C  | -0.52038030 | -4.32240490 | 9.93753390  |
| C  | -2.67010190 | -4.77370370 | 10.85854980 |
| H  | -2.86598630 | -5.64615990 | 10.21453800 |
| H  | -3.59952290 | -4.21529560 | 11.00998380 |
| H  | -2.28343200 | -5.11753240 | 11.83126100 |
| C  | -0.06089980 | -5.60575340 | 10.18671150 |
| H  | -0.72582970 | -6.33274560 | 10.65309920 |
| C  | 1.25682430  | -6.01523890 | 9.85229050  |
| C  | 1.70157800  | -7.42223590 | 10.15032290 |
| H  | 2.73524900  | -7.59005450 | 9.82233670  |
| H  | 1.06229300  | -8.16103200 | 9.64376320  |
| H  | 1.65139970  | -7.63742310 | 11.22831760 |
| C  | 2.09121640  | -5.09205460 | 9.26251440  |
| H  | 3.11219780  | -5.37136950 | 8.99376840  |
| C  | 1.65800900  | -3.76290120 | 8.98579400  |
| C  | 2.59029420  | -2.86832350 | 8.39394760  |
| H  | 3.60836680  | -3.25281840 | 8.24114780  |
| C  | 3.41962880  | -0.81975740 | 7.44241770  |
| H  | 4.16095530  | -1.44304780 | 6.91966320  |
| H  | 3.95027990  | -0.30099190 | 8.25649690  |
| C  | 2.77741140  | 0.19376740  | 6.49332020  |
| H  | 3.41774360  | 1.07876770  | 6.35803770  |

|          |             |             |             |
|----------|-------------|-------------|-------------|
| H        | 2.62736680  | -0.25312120 | 5.49790600  |
| C        | 0.98560930  | 1.76000360  | 6.85274050  |
| H        | 1.60253850  | 2.47128960  | 6.28655810  |
| C        | -0.27737340 | 2.23184380  | 7.30426440  |
| C        | -1.21316210 | 1.35976590  | 7.93219580  |
| C        | -2.47791590 | 1.92014030  | 8.31369430  |
| C        | -4.61423940 | 1.51372940  | 9.28629270  |
| H        | -4.52913050 | 2.31204500  | 10.04120560 |
| H        | -5.13628260 | 0.65430640  | 9.71929930  |
| H        | -5.18049980 | 1.88994310  | 8.41901360  |
| C        | -2.75109630 | 3.25965180  | 8.08610500  |
| H        | -3.71377330 | 3.67005710  | 8.39108560  |
| C        | -1.81414390 | 4.12737030  | 7.46674330  |
| C        | -2.16628960 | 5.57423140  | 7.24575590  |
| H        | -2.38187030 | 6.08457500  | 6.19687130  |
| H        | -3.06224930 | 5.67600470  | 6.61520430  |
| H        | -1.34623160 | 6.11211710  | 6.75361590  |
| C        | -0.60025310 | 3.60118980  | 7.08277020  |
| H        | 0.14240730  | 4.23787390  | 6.59741380  |
| C        | 2.07428870  | 1.00503080  | 9.97783090  |
| H        | 2.77486440  | 1.12668520  | 9.15748570  |
| C        | 0.75416460  | -2.36669930 | 5.57579720  |
| C        | 0.22965970  | -3.16249910 | 4.56459960  |
| C        | -1.14054090 | -3.41859730 | 4.54799360  |
| C        | -1.92954670 | -2.86544710 | 5.55398190  |
| C        | -1.33801650 | -2.07581430 | 6.53426570  |
| N        | -0.01253460 | -1.82063600 | 6.53860570  |
| H        | -1.58138120 | -4.04366340 | 3.77129790  |
| H        | 1.82108200  | -2.17647520 | 5.63215150  |
| H        | 0.89688460  | -3.57829580 | 3.81097190  |
| H        | -3.00333740 | -3.04178430 | 5.59542800  |
| H        | -1.90801730 | -1.62650890 | 7.34358780  |
| C        | 2.24342120  | 1.70872830  | 11.16380910 |
| C        | 1.30098540  | 1.55719440  | 12.17958760 |
| C        | 0.22217440  | 0.70343600  | 11.96103820 |
| C        | 0.11773400  | 0.02589600  | 10.75107550 |
| H        | 1.40373910  | 2.09916260  | 13.11967680 |
| H        | 3.10187420  | 2.36947270  | 11.27591580 |
| H        | -0.54766250 | 0.55584400  | 12.71707110 |
| H        | -0.70562400 | -0.64839460 | 10.52945160 |
| <b>4</b> |             |             |             |
| Co       | 9.3823256   | 13.5706133  | 3.7267776   |
| O        | 9.6957357   | 12.5603893  | 5.3100738   |
| O        | 9.1473309   | 11.1468739  | 7.4201937   |
| O        | 8.1290232   | 14.5666752  | 4.7469313   |
| O        | 6.3835316   | 15.4739363  | 6.4280844   |
| N        | 10.6545886  | 12.6038290  | 2.7214271   |
| N        | 9.0872939   | 14.5248249  | 2.1114274   |
| N        | 7.9391486   | 12.3048611  | 3.3478606   |
| N        | 10.7570086  | 14.8323200  | 4.3214194   |
| C        | 10.0878166  | 11.3129530  | 5.2752027   |
| C        | 9.8276858   | 10.5039662  | 6.4331809   |
| C        | 8.8633730   | 10.4081855  | 8.6083223   |
| H        | 8.2311942   | 9.5308885   | 8.3944063   |
| H        | 8.3232414   | 11.0982952  | 9.2644186   |
| H        | 9.7899697   | 10.0773596  | 9.1045035   |
| C        | 10.2475033  | 9.1836599   | 6.4800446   |
| H        | 10.0324482  | 8.5838012   | 7.3646932   |
| C        | 10.9504291  | 8.5744721   | 5.4086999   |
| C        | 11.3836559  | 7.1372728   | 5.5201609   |
| H        | 11.9199261  | 6.8127295   | 4.6195765   |
| H        | 10.5206220  | 6.4683005   | 5.6583835   |
| H        | 12.0497448  | 6.9852461   | 6.3828088   |
| C        | 11.2119839  | 9.3352461   | 4.2900158   |
| H        | 11.7509705  | 8.8997783   | 3.4457930   |
| C        | 10.7839843  | 10.6892334  | 4.1947862   |
| C        | 11.1123284  | 11.4214678  | 3.0185170   |
| H        | 11.8104940  | 10.9522145  | 2.3112350   |
| C        | 11.1429010  | 13.3615359  | 1.5726353   |
| H        | 11.6034580  | 12.6988679  | 0.8241502   |
| H        | 11.9127542  | 14.0685744  | 1.9205976   |
| C        | 9.9582021   | 14.1324648  | 0.9931871   |
| H        | 10.2985753  | 15.0153864  | 0.4320710   |
| H        | 9.3939528   | 13.4955190  | 0.2919278   |
| C        | 8.1323948   | 15.3915369  | 1.9191251   |
| H        | 8.0402213   | 15.8300613  | 0.9156809   |
| C        | 7.1947102   | 15.8376711  | 2.8911684   |

|           |            |            |            |
|-----------|------------|------------|------------|
| C         | 7.2553887  | 15.3977795 | 4.2492158  |
| C         | 6.2731723  | 15.9338951 | 5.1526430  |
| C         | 5.4578625  | 15.9825591 | 7.3885851  |
| H         | 5.5413555  | 17.0774376 | 7.4832073  |
| H         | 5.7281565  | 15.5118392 | 8.3393089  |
| H         | 4.4206852  | 15.7172653 | 7.1264444  |
| C         | 5.3155134  | 16.8277485 | 4.7036727  |
| H         | 4.5737713  | 17.2144504 | 5.4028701  |
| C         | 5.2584016  | 17.2612240 | 3.3524723  |
| C         | 4.1900902  | 18.2313325 | 2.9239760  |
| H         | 4.2751117  | 18.4709422 | 1.8564378  |
| H         | 4.2545760  | 19.1738706 | 3.4882370  |
| H         | 3.1838436  | 17.8203591 | 3.0976074  |
| C         | 6.1954268  | 16.7661434 | 2.4746411  |
| H         | 6.1822911  | 17.0779192 | 1.4279217  |
| C         | 7.7514968  | 11.6897252 | 2.1644262  |
| H         | 8.4528711  | 11.9331464 | 1.3709043  |
| C         | 6.7310677  | 10.7758690 | 1.9563779  |
| H         | 6.6292077  | 10.3083544 | 0.9764884  |
| C         | 5.8479362  | 10.4581429 | 2.9990766  |
| C         | 6.0628095  | 11.1060883 | 4.2201957  |
| H         | 5.4187360  | 10.9054844 | 5.0765621  |
| C         | 7.1025057  | 12.0146111 | 4.3659640  |
| H         | 7.2995063  | 12.5319733 | 5.3025151  |
| C         | 10.5559609 | 16.1623177 | 4.2454104  |
| H         | 9.6270233  | 16.4934292 | 3.7876947  |
| C         | 11.4773258 | 17.0773186 | 4.7352115  |
| H         | 11.2608606 | 18.1422811 | 4.6465810  |
| C         | 12.6619882 | 16.6350580 | 5.3383105  |
| C         | 12.8464200 | 15.2478912 | 5.4139101  |
| H         | 13.7409623 | 14.8291431 | 5.8756392  |
| C         | 11.8848707 | 14.3845043 | 4.9087817  |
| H         | 11.9986861 | 13.3058913 | 4.9803775  |
| C         | 13.6660127 | 17.5952864 | 5.9031703  |
| H         | 13.4555807 | 17.7790616 | 6.9687991  |
| H         | 14.6859822 | 17.1955484 | 5.8375226  |
| H         | 13.6299951 | 18.5642632 | 5.3900120  |
| C         | 4.7297662  | 9.4777372  | 2.8032183  |
| H         | 3.9887547  | 9.8740011  | 2.0923833  |
| H         | 5.1037994  | 8.5338813  | 2.3820882  |
| H         | 4.2135029  | 9.2589748  | 3.7454641  |
| <b>4'</b> |            |            |            |
| Co        | 0.6603979  | -0.7899166 | 8.0906590  |
| O         | -0.1616485 | -2.1553414 | 9.1265897  |
| O         | -1.7670618 | -3.8608345 | 10.2344622 |
| O         | -1.0267680 | 0.0872439  | 8.1720565  |
| O         | -3.3300769 | 1.0301676  | 8.8953777  |
| N         | 2.3476766  | -1.6448294 | 8.0103687  |
| N         | 1.4762021  | 0.5683779  | 7.0545499  |
| N         | 1.0395126  | 0.1726431  | 9.7712235  |
| C         | 0.3346690  | -3.3474152 | 9.3195925  |
| C         | -0.5203150 | -4.3222652 | 9.9374275  |
| C         | -2.6696484 | -4.7743428 | 10.8584567 |
| H         | -2.8662045 | -5.6468330 | 10.2144119 |
| H         | -3.5991391 | -4.2162269 | 11.0111074 |
| H         | -2.2824042 | -5.1187837 | 11.8308461 |
| C         | -0.0615617 | -5.6058688 | 10.1852235 |
| H         | -0.7268963 | -6.3327753 | 10.6510786 |
| C         | 1.2562727  | -6.0151920 | 9.8508165  |
| C         | 1.7003292  | -7.4223781 | 10.1493056 |
| H         | 2.7341223  | -7.5911181 | 9.8221254  |
| H         | 1.0610431  | -8.1609803 | 9.6423635  |
| H         | 1.6491596  | -7.6375048 | 11.2273512 |
| C         | 2.0907988  | -5.0914118 | 9.2622824  |
| H         | 3.1124728  | -5.3698015 | 8.9950455  |
| C         | 1.6580197  | -3.7620451 | 8.9863500  |
| C         | 2.5902902  | -2.8672994 | 8.3942867  |
| H         | 3.6081128  | -3.2520054 | 8.2401134  |
| C         | 3.4188992  | -0.8186560 | 7.4440811  |
| H         | 4.1613890  | -1.4419922 | 6.9230034  |
| H         | 3.9474981  | -0.2974778 | 8.2579505  |
| C         | 2.7763333  | 0.1926926  | 6.4930865  |
| H         | 3.4165640  | 1.0776544  | 6.3565914  |
| H         | 2.6258694  | -0.2565308 | 5.4987750  |
| C         | 0.9854254  | 1.7589440  | 6.8525290  |
| H         | 1.6033057  | 2.4708145  | 6.2880037  |
| C         | -0.2781060 | 2.2304250  | 7.3034784  |



|          |            |            |            |
|----------|------------|------------|------------|
| C        | -1.2139984 | 1.3577876  | 7.9311310  |
| C        | -2.4785424 | 1.9196247  | 8.3130911  |
| C        | -4.6144611 | 1.5158614  | 9.2866934  |
| H        | -4.5286884 | 2.3142812  | 10.0416411 |
| H        | -5.1374593 | 0.6572692  | 9.7202620  |
| H        | -5.1806753 | 1.8933538  | 8.4197725  |
| C        | -2.7516558 | 3.2589936  | 8.0858713  |
| H        | -3.7145091 | 3.6693836  | 8.3904628  |
| C        | -1.8144376 | 4.1264416  | 7.4665170  |
| C        | -2.1670830 | 5.5731218  | 7.2451683  |
| H        | -2.3829208 | 6.0834727  | 8.1962684  |
| H        | -3.0630486 | 5.6745479  | 6.6143906  |
| H        | -1.3470549 | 6.1113982  | 6.7533527  |
| C        | -0.6008569 | 3.5998190  | 7.0824097  |
| H        | 0.1418230  | 4.2362560  | 6.5966073  |
| C        | 2.0739668  | 1.0077865  | 9.9823091  |
| H        | 2.7766847  | 1.1364498  | 9.1643227  |
| C        | 0.7515846  | -2.3698368 | 5.5738829  |
| C        | 0.2232247  | -3.1547955 | 4.5596194  |
| C        | -1.1517601 | -3.4211343 | 4.5200971  |
| C        | -1.9237254 | -2.8604304 | 5.5444070  |
| C        | -1.3342043 | -2.0806975 | 6.5298268  |
| N        | -0.0091373 | -1.8232282 | 6.5410844  |
| H        | 1.8203908  | -2.1865491 | 5.6271052  |
| H        | 0.8933315  | -3.5630576 | 3.8026098  |
| H        | -3.0001361 | -3.0289918 | 5.5854530  |
| H        | -1.9092016 | -1.6374747 | 7.3390773  |
| C        | 2.2448362  | 1.7010279  | 11.1712861 |
| C        | 1.3132547  | 1.5591482  | 12.2080369 |
| C        | 0.2352920  | 0.7002622  | 11.9634894 |
| C        | 0.1233793  | 0.0315704  | 10.7524352 |
| H        | 3.1085848  | 2.3572386  | 11.2821317 |
| H        | -0.5339221 | 0.5433788  | 12.7200753 |
| H        | -0.7047781 | -0.6381319 | 10.5346098 |
| C        | 1.4484216  | 2.3124739  | 13.4979317 |
| H        | 2.5015402  | 2.4788002  | 13.7584610 |
| H        | 0.9723662  | 3.3019753  | 13.4111793 |
| H        | 0.9579550  | 1.7840926  | 14.3249948 |
| C        | -1.7576180 | -4.2889418 | 3.4573092  |
| H        | -1.2059862 | -4.2129027 | 2.5116359  |
| H        | -1.7296742 | -5.3452463 | 3.7686191  |
| H        | -2.8081767 | -4.0284740 | 3.2770993  |
| <b>5</b> |            |            |            |
| Co       | 9.3796958  | 13.5831829 | 3.7008415  |
| O        | 9.7065266  | 12.5829214 | 5.2877343  |
| O        | 9.1656345  | 11.1798525 | 7.4060336  |
| O        | 8.1391976  | 14.5861238 | 4.7281541  |
| O        | 6.3843573  | 15.4648053 | 6.4126346  |
| N        | 10.6410191 | 12.6095764 | 2.6892465  |
| N        | 9.0683431  | 14.5283901 | 2.0836420  |
| N        | 7.9290913  | 12.3172867 | 3.3471126  |
| N        | 10.7658123 | 14.8458343 | 4.2712898  |
| C        | 10.0967908 | 11.3349017 | 5.2566839  |
| C        | 9.8418102  | 10.5316676 | 6.4198468  |
| C        | 8.8785093  | 10.4461445 | 8.5967445  |
| H        | 8.2420262  | 9.5714221  | 8.3856916  |
| H        | 8.3417766  | 11.1410797 | 9.2505366  |
| H        | 9.8034179  | 10.1127109 | 9.0942513  |
| C        | 10.2622737 | 9.2116664  | 6.4712665  |
| H        | 10.0505702 | 8.6157588  | 7.3593526  |
| C        | 10.9612222 | 8.5979712  | 5.3998114  |
| C        | 11.3974746 | 7.1620844  | 5.5162641  |
| H        | 11.9301988 | 6.8344212  | 4.6146804  |
| H        | 10.5361960 | 6.4924401  | 5.6614741  |
| H        | 12.0677890 | 7.0151831  | 6.3765527  |
| C        | 11.2161823 | 9.3528075  | 4.2756143  |
| H        | 11.7508852 | 8.9132719  | 3.4307323  |
| C        | 10.7863468 | 10.7057909 | 4.1750784  |
| C        | 11.1040631 | 11.4304081 | 2.9909817  |
| H        | 11.7974168 | 10.9573469 | 2.2813397  |
| C        | 11.1164890 | 13.3601997 | 1.5304247  |
| H        | 11.5716615 | 12.6934974 | 0.7821803  |
| H        | 11.8870301 | 14.0725682 | 1.8654784  |
| C        | 9.9234619  | 14.1235376 | 0.9581417  |
| H        | 10.2546999 | 14.9991998 | 0.3804310  |
| H        | 9.3504336  | 13.4768296 | 0.2728423  |
| C        | 8.1172253  | 15.4014542 | 1.8982045  |

|           |            |            |            |
|-----------|------------|------------|------------|
| H         | 8.0181623  | 15.8376374 | 0.8943622  |
| C         | 7.1909261  | 15.8543572 | 2.8777077  |
| C         | 7.2587385  | 15.4125424 | 4.2348376  |
| C         | 6.2744047  | 15.9379078 | 5.1420994  |
| C         | 5.4450934  | 15.9467769 | 7.3738525  |
| H         | 5.5189873  | 17.0399410 | 7.4921469  |
| H         | 5.7095817  | 15.4585640 | 8.3173661  |
| H         | 4.4129891  | 15.6785975 | 7.0953592  |
| C         | 5.3150014  | 16.8334032 | 4.7002575  |
| H         | 4.5730181  | 17.2137054 | 5.4026960  |
| C         | 5.2560923  | 17.2758225 | 3.3518930  |
| C         | 4.1874710  | 18.2490257 | 2.9312590  |
| H         | 4.2661858  | 18.4892265 | 1.8633899  |
| H         | 4.2577927  | 19.1910831 | 3.4956835  |
| H         | 3.1815301  | 17.8402046 | 3.1111250  |
| C         | 6.1902651  | 16.7849182 | 2.4686678  |
| H         | 6.1730707  | 17.1011372 | 1.4233353  |
| C         | 7.7250418  | 11.6961459 | 2.1718917  |
| H         | 8.4201187  | 11.9269873 | 1.3691195  |
| C         | 6.6974726  | 10.7899786 | 1.9685951  |
| H         | 6.5788560  | 10.3173942 | 0.9927661  |
| C         | 5.8316600  | 10.5014390 | 3.0334320  |
| C         | 6.0486826  | 11.1439321 | 4.2594953  |
| H         | 5.3982542  | 10.9408111 | 5.1083434  |
| C         | 7.0965085  | 12.0372787 | 4.3778776  |
| H         | 7.3071381  | 12.5593521 | 5.3086844  |
| C         | 10.5753349 | 16.1796630 | 4.1794734  |
| H         | 9.6518904  | 16.5109045 | 3.7111189  |
| C         | 11.4874423 | 17.1003793 | 4.6619709  |
| H         | 11.2979863 | 18.1687896 | 4.5745313  |
| C         | 12.6572961 | 16.6364062 | 5.2798890  |
| C         | 12.8516077 | 15.2515858 | 5.3814190  |
| H         | 13.7381296 | 14.8351873 | 5.8614625  |
| C         | 11.8857739 | 14.3983203 | 4.8730847  |
| H         | 11.9936281 | 13.3201442 | 4.9584867  |
| O         | 13.5299078 | 17.5533911 | 5.7461734  |
| H         | 14.2925973 | 17.1138558 | 6.1659724  |
| O         | 4.7994380  | 9.6363071  | 2.9477063  |
| H         | 4.7483318  | 9.2559204  | 2.0513514  |
| <b>5'</b> |            |            |            |
| Co        | 0.6828569  | -0.7855652 | 8.0907820  |
| O         | -0.1486764 | -2.1599114 | 9.1085629  |
| O         | -1.7535659 | -3.8687822 | 10.2175546 |
| O         | -1.0000486 | 0.0984164  | 8.1941806  |
| O         | -3.3056695 | 1.0441743  | 8.9117507  |
| N         | 2.3654650  | -1.6466465 | 7.9997207  |
| N         | 1.5020710  | 0.5774217  | 7.0650617  |
| N         | 1.0775915  | 0.1517963  | 9.7827323  |
| C         | 0.3471663  | -3.3529926 | 9.2987275  |
| C         | -0.5068165 | -4.3292485 | 9.9155925  |
| C         | -2.6539253 | -4.7861885 | 10.8389196 |
| H         | -2.8514965 | -5.6555008 | 10.1908392 |
| H         | -3.5836202 | -4.2298727 | 10.9973031 |
| H         | -2.2639529 | -5.1361481 | 11.8082645 |
| C         | -0.0485718 | -5.6138185 | 10.1591025 |
| H         | -0.7138727 | -6.3413669 | 10.6239776 |
| C         | 1.2681842  | -6.0233436 | 9.8215195  |
| C         | 1.7108501  | -7.4325069 | 10.1121689 |
| H         | 2.7478435  | -7.5974085 | 9.7933662  |
| H         | 1.0771972  | -8.1668537 | 9.5921044  |
| H         | 1.6494981  | -7.6573535 | 11.1876273 |
| C         | 2.1024719  | -5.0979045 | 9.2352609  |
| H         | 3.1237003  | -5.3760444 | 8.9662179  |
| C         | 1.6702743  | -3.7675055 | 8.9641380  |
| C         | 2.6047319  | -2.8716876 | 8.3767551  |
| H         | 3.6217582  | -3.2577776 | 8.2212366  |
| C         | 3.4400948  | -0.8182541 | 7.4429965  |
| H         | 4.1825815  | -1.4386742 | 6.9185781  |
| H         | 3.9676313  | -0.3052377 | 8.2627379  |
| C         | 2.8009692  | 0.2018937  | 6.4997062  |
| H         | 3.4435939  | 1.0858998  | 6.3687277  |
| H         | 2.6481072  | -0.2398128 | 5.5023193  |
| C         | 1.0087345  | 1.7660943  | 6.8594937  |
| H         | 1.6254330  | 2.4775317  | 6.2932122  |
| C         | -0.2567629 | 2.2363344  | 7.3064541  |
| C         | -1.1901180 | 1.3666122  | 7.9421235  |
| C         | -2.4558735 | 1.9293304  | 8.3186901  |

|          |            |            |            |
|----------|------------|------------|------------|
| C        | -4.5859520 | 1.5357962  | 9.3086626  |
| H        | -4.4923236 | 2.3427414  | 10.0536135 |
| H        | -5.1065482 | 0.6830028  | 9.7564375  |
| H        | -5.1596974 | 1.9048513  | 8.4429937  |
| C        | -2.7338269 | 3.2649240  | 8.0761509  |
| H        | -3.6986352 | 3.6747487  | 8.3751233  |
| C        | -1.7997546 | 4.1289998  | 7.4476613  |
| C        | -2.1576730 | 5.5718228  | 7.2104624  |
| H        | -2.3737886 | 6.0915926  | 8.1563389  |
| H        | -3.0548421 | 5.6632823  | 6.5798732  |
| H        | -1.3402971 | 6.1076118  | 6.7116361  |
| C        | -0.5838308 | 3.6023697  | 7.0712219  |
| H        | 0.1574000  | 4.2361603  | 6.5798287  |
| C        | 2.1081426  | 0.9957993  | 9.9931507  |
| H        | 2.7993825  | 1.1403180  | 9.1684012  |
| C        | 0.7674029  | -2.3421780 | 5.5567622  |
| C        | 0.2491283  | -3.1103230 | 4.5306127  |
| C        | -1.1326979 | -3.3422350 | 4.4941983  |
| C        | -1.9228661 | -2.7888110 | 5.5100571  |
| C        | -1.3216808 | -2.0295260 | 6.5004678  |
| N        | 0.0070762  | -1.7897279 | 6.5243495  |
| H        | 1.8381510  | -2.1761653 | 5.6207791  |
| H        | 0.9003114  | -3.5367709 | 3.7697958  |
| H        | -3.0016315 | -2.9482146 | 5.5410467  |
| H        | -1.8965429 | -1.5864338 | 7.3102347  |
| C        | 2.2966745  | 1.6810201  | 11.1790053 |
| C        | 1.3677416  | 1.5049532  | 12.2135542 |
| C        | 0.2850658  | 0.6441366  | 11.9911805 |
| C        | 0.1735745  | -0.0063591 | 10.7733616 |
| H        | 3.1441963  | 2.3519677  | 11.3066094 |
| H        | -0.4748769 | 0.4779626  | 12.7561662 |
| H        | -0.6523569 | -0.6799240 | 10.5576850 |
| O        | 1.5686849  | 2.1825006  | 13.3628738 |
| H        | 0.8589048  | 1.9818653  | 14.0007943 |
| O        | -1.6191401 | -4.0950391 | 3.4856778  |
| H        | -2.5867345 | -4.1848540 | 3.5679840  |
| <b>6</b> |            |            |            |
| Co       | 9.3856309  | 13.5564490 | 3.7043969  |
| O        | 9.6901703  | 12.5472531 | 5.2914843  |
| O        | 9.1561922  | 11.1439978 | 7.4125152  |
| O        | 8.1297506  | 14.5555469 | 4.7220876  |
| O        | 6.3720545  | 15.4578298 | 6.3969658  |
| N        | 10.6549717 | 12.5855471 | 2.7036962  |
| N        | 9.0962111  | 14.5128355 | 2.0916523  |
| N        | 7.9416749  | 12.2915320 | 3.3182804  |
| N        | 10.7708636 | 14.8124206 | 4.2913356  |
| C        | 10.0885532 | 11.3035785 | 5.2624562  |
| C        | 9.8359744  | 10.4983320 | 6.4258061  |
| C        | 8.8687238  | 10.4062044 | 8.5990465  |
| H        | 8.2390941  | 9.5272564  | 8.3832096  |
| H        | 8.3245029  | 11.0954798 | 9.2528705  |
| H        | 9.7931665  | 10.0762677 | 9.1002885  |
| C        | 10.2602313 | 9.1801232  | 6.4788116  |
| H        | 10.0504657 | 8.5838479  | 7.3672015  |
| C        | 10.9622231 | 8.5681875  | 5.4081686  |
| C        | 11.4004294 | 7.1328288  | 5.5250669  |
| H        | 11.9334893 | 6.8059263  | 4.6233069  |
| H        | 10.5401707 | 6.4615708  | 5.6703868  |
| H        | 12.0713483 | 6.9866845  | 6.3851531  |
| C        | 11.2182963 | 9.3245164  | 4.2855388  |
| H        | 11.7573828 | 8.8868615  | 3.4423485  |
| C        | 10.7855667 | 10.6764869 | 4.1839208  |
| C        | 11.1122507 | 11.4042575 | 3.0042272  |
| H        | 11.8103737 | 10.9320737 | 2.2986280  |
| C        | 11.1453644 | 13.3404229 | 1.5544243  |
| H        | 11.6066920 | 12.6764221 | 0.8074140  |
| H        | 11.9135200 | 14.0485792 | 1.9035188  |
| C        | 9.9615220  | 14.1108669 | 0.9734050  |
| H        | 10.3021828 | 14.9885162 | 0.4041255  |
| H        | 9.3924701  | 13.4698698 | 0.2797422  |
| C        | 8.1563384  | 15.3956404 | 1.9005063  |
| H        | 8.0744600  | 15.8401741 | 0.8987603  |
| C        | 7.2226410  | 15.8522419 | 2.8719622  |
| C        | 7.2690727  | 15.3986314 | 4.2264863  |
| C        | 6.2831491  | 15.9370721 | 5.1260823  |
| C        | 5.4363681  | 15.9583224 | 7.3505091  |
| H        | 5.5301176  | 17.0502693 | 7.4690807  |

|           |            |            |            |
|-----------|------------|------------|------------|
| H         | 5.6841140  | 15.4655950 | 8.2963771  |
| H         | 4.4004248  | 15.7112186 | 7.0656172  |
| C         | 5.3439280  | 16.8514872 | 4.6803918  |
| H         | 4.6021592  | 17.2419928 | 5.3775944  |
| C         | 5.3061137  | 17.3026774 | 3.3340969  |
| C         | 4.2584700  | 18.2970168 | 2.9088878  |
| H         | 4.3558404  | 18.5475473 | 1.8447621  |
| H         | 4.3351499  | 19.2321981 | 3.4841282  |
| H         | 3.2433320  | 17.9028831 | 3.0701338  |
| C         | 6.2415534  | 16.8010746 | 2.4582686  |
| H         | 6.2414175  | 17.1241728 | 1.4147177  |
| C         | 7.7534924  | 11.6714691 | 2.1364857  |
| H         | 8.4603551  | 11.9064649 | 1.3451319  |
| C         | 6.7364696  | 10.7666862 | 1.9097750  |
| H         | 6.6414852  | 10.3020043 | 0.9284376  |
| C         | 5.8371367  | 10.4537023 | 2.9527016  |
| C         | 6.0487151  | 11.1050163 | 4.1871563  |
| H         | 5.3970273  | 10.9105730 | 5.0390446  |
| C         | 7.0893431  | 11.9990698 | 4.3291489  |
| H         | 7.2787958  | 12.5143370 | 5.2684402  |
| C         | 10.5840231 | 16.1479635 | 4.2235751  |
| H         | 9.6596490  | 16.4900780 | 3.7644382  |
| C         | 11.4957154 | 17.0600255 | 4.7162850  |
| H         | 11.2812532 | 18.1256392 | 4.6343157  |
| C         | 12.6836102 | 16.6043777 | 5.3288896  |
| C         | 12.8634122 | 15.2054359 | 5.3988485  |
| H         | 13.7503512 | 14.7776315 | 5.8663166  |
| C         | 11.8984247 | 14.3631887 | 4.8847099  |
| H         | 12.0104433 | 13.2842198 | 4.9552219  |
| N         | 13.6154682 | 17.4685232 | 5.8099125  |
| H         | 14.4034605 | 17.1289015 | 6.3463864  |
| H         | 13.4214334 | 18.4606526 | 5.8555077  |
| N         | 4.8304257  | 9.5586667  | 2.7804033  |
| H         | 4.1542026  | 9.3906280  | 3.5136899  |
| H         | 4.6481892  | 9.1463477  | 1.8749553  |
| <b>6'</b> |            |            |            |
| Co        | 0.6470525  | -0.7913012 | 8.1138072  |
| O         | -0.1799815 | -2.1590579 | 9.1426390  |
| O         | -1.7900449 | -3.8567570 | 10.2512974 |
| O         | -1.0393783 | 0.0860382  | 8.2100106  |
| O         | -3.3526243 | 1.0190976  | 8.9118730  |
| N         | 2.3277424  | -1.6532736 | 8.0254191  |
| N         | 1.4623105  | 0.5685768  | 7.0837403  |
| N         | 1.0418345  | 0.1621907  | 9.7981551  |
| C         | 0.3077867  | -3.3548529 | 9.3211752  |
| C         | -0.5502992 | -4.3284799 | 9.9382843  |
| C         | -2.6937552 | -4.7637159 | 10.8804104 |
| H         | -2.9080076 | -5.6306318 | 10.2341734 |
| H         | -3.6156602 | -4.1969165 | 11.0476141 |
| H         | -2.2989039 | -5.1185780 | 11.8462513 |
| C         | -0.1024965 | -5.6182605 | 10.1704961 |
| H         | -0.7705272 | -6.3437094 | 10.6350636 |
| C         | 1.2092236  | -6.0356977 | 9.8211657  |
| C         | 1.6432582  | -7.4491167 | 10.1046748 |
| H         | 2.6745832  | -7.6229325 | 9.7722137  |
| H         | 0.9965324  | -8.1787980 | 9.5940145  |
| H         | 1.5948281  | -7.6735950 | 11.1809609 |
| C         | 2.0475788  | -5.1137821 | 9.2348283  |
| H         | 3.0650422  | -5.3990194 | 8.9582397  |
| C         | 1.6255345  | -3.7778389 | 8.9750341  |
| C         | 2.5634226  | -2.8820115 | 8.3920245  |
| H         | 3.5785771  | -3.2714808 | 8.2315815  |
| C         | 3.4014845  | -0.8222868 | 7.4734796  |
| H         | 4.1505809  | -1.4398680 | 6.9545647  |
| H         | 3.9197884  | -0.3042842 | 8.2960115  |
| C         | 2.7632573  | 0.1939862  | 6.5242139  |
| H         | 3.4052834  | 1.0785634  | 6.3923036  |
| H         | 2.6144649  | -0.2525748 | 5.5282894  |
| C         | 0.9689426  | 1.7575029  | 6.8803570  |
| H         | 1.5855626  | 2.4715017  | 6.3168350  |
| C         | -0.2980711 | 2.2252353  | 7.3269444  |
| C         | -1.2318376 | 1.3514306  | 7.9574747  |
| C         | -2.5021907 | 1.9100307  | 8.3284622  |
| C         | -4.6398832 | 1.5010732  | 9.2941400  |
| H         | -4.5616684 | 2.3049530  | 10.0443812 |
| H         | -5.1613877 | 0.6431392  | 9.7311024  |
| H         | -5.2048059 | 1.8710499  | 8.4228439  |

|   |            |            |            |
|---|------------|------------|------------|
| C | -2.7825453 | 3.2454228  | 8.0906895  |
| H | -3.7494697 | 3.6525627  | 8.3870081  |
| C | -1.8466188 | 4.1136174  | 7.4698813  |
| C | -2.2078520 | 5.5561631  | 7.2353361  |
| H | -2.4359168 | 6.0719940  | 8.1806884  |
| H | -3.0990288 | 5.6468461  | 6.5959815  |
| H | -1.3876336 | 6.0971204  | 6.7466858  |
| C | -0.6282246 | 3.5912995  | 7.0957541  |
| H | 0.1129662  | 4.2289768  | 6.6089833  |
| C | 2.0605698  | 1.0214092  | 10.0031076 |
| H | 2.7541440  | 1.1650031  | 9.1795816  |
| C | 0.7317696  | -2.3614367 | 5.5831346  |
| C | 0.2170253  | -3.1457028 | 4.5702032  |
| C | -1.1691015 | -3.4111866 | 4.5294703  |
| C | -1.9475011 | -2.8464270 | 5.5623902  |
| C | -1.3516685 | -2.0704187 | 6.5350281  |
| N | -0.0235971 | -1.8071469 | 6.5532098  |
| H | 1.8017586  | -2.1829820 | 5.6331787  |
| H | 0.8896855  | -3.5584520 | 3.8184098  |
| H | -3.0229813 | -3.0183957 | 5.6079965  |
| H | -1.9296860 | -1.6289647 | 7.3431598  |
| C | 2.2390722  | 1.7260228  | 11.1766309 |
| C | 1.3136021  | 1.5701992  | 12.2312909 |
| C | 0.2399572  | 0.6836788  | 11.9995848 |
| C | 0.1393089  | 0.0154795  | 10.7967460 |
| H | 3.0890667  | 2.4019403  | 11.2706459 |
| H | -0.5226235 | 0.5192748  | 12.7612012 |
| H | -0.6816825 | -0.6675822 | 10.5929232 |
| N | 1.4433843  | 2.2463673  | 13.4009598 |
| H | 0.7806726  | 2.1175398  | 14.1539858 |
| H | 2.2213028  | 2.8720282  | 13.5624996 |
| N | -1.7229964 | -4.1718140 | 3.5512601  |
| H | -2.7137590 | -4.3749620 | 3.5472741  |
| H | -1.1538816 | -4.5975426 | 2.8318497  |

## Geometries of A-C

|          |            |            |            |
|----------|------------|------------|------------|
| <b>A</b> |            |            |            |
| Co       | 0.5281937  | -0.7776869 | 8.0988543  |
| O        | -0.1882720 | -2.0035790 | 9.3547020  |
| O        | -1.8162073 | -3.6863765 | 10.5078044 |
| O        | -1.2006840 | 0.0005096  | 7.9695600  |
| O        | -3.5007643 | 0.9629795  | 8.7589048  |
| N        | 2.2330300  | -1.5979712 | 8.0955033  |
| N        | 1.2991233  | 0.5108316  | 6.9488290  |
| C        | 0.2485134  | -3.2442378 | 9.4847768  |
| C        | -0.6182276 | -4.1906963 | 10.1224231 |
| C        | -2.7262773 | -4.5729464 | 11.1670452 |
| H        | -3.0035463 | -5.4168177 | 10.5155675 |
| H        | -3.6145843 | -3.9725603 | 11.3861876 |
| H        | -2.2978502 | -4.9560370 | 12.1063725 |
| C        | -0.2001795 | -5.5031911 | 10.3131971 |
| H        | -0.8721100 | -6.2124942 | 10.7960699 |
| C        | 1.0745848  | -5.9573714 | 9.8995360  |
| C        | 1.4714699  | -7.3902854 | 10.1305290 |
| H        | 2.4882387  | -7.5862803 | 9.7685237  |
| H        | 0.7888449  | -8.0810081 | 9.6132683  |
| H        | 1.4382619  | -7.6439673 | 11.2002839 |
| C        | 1.9233023  | -5.0516876 | 9.2913662  |
| H        | 2.9148957  | -5.3680744 | 8.9622781  |
| C        | 1.5344929  | -3.7032296 | 9.0746334  |
| C        | 2.4816560  | -2.8155012 | 8.4741700  |
| H        | 3.4989100  | -3.2012770 | 8.3232866  |
| C        | 3.2638271  | -0.7345617 | 7.5170495  |
| H        | 4.1110774  | -1.3236280 | 7.1366007  |
| H        | 3.6317675  | -0.0519403 | 8.2992040  |
| C        | 2.5846829  | 0.0686223  | 6.4079014  |
| H        | 3.1981265  | 0.9224653  | 6.0846640  |
| H        | 2.3962267  | -0.5802213 | 5.5383886  |
| C        | 0.8249861  | 1.7007100  | 6.7340422  |
| H        | 1.4312058  | 2.3949976  | 6.1369276  |
| C        | -0.4310028 | 2.1850274  | 7.2216939  |
| C        | -1.3798058 | 1.3004918  | 7.8143056  |
| C        | -2.6324994 | 1.8585963  | 8.2303596  |
| C        | -4.7830947 | 1.4463930  | 9.1735082  |
| H        | -4.6872485 | 2.1967371  | 9.9741356  |

|          |             |             |             |
|----------|-------------|-------------|-------------|
| H        | -5.3174324  | 0.5705832   | 9.5541393   |
| H        | -5.3377340  | 1.8788796   | 8.3260956   |
| C        | -2.8808139  | 3.2173756   | 8.0657107   |
| H        | -3.8341836  | 3.6293306   | 8.3962623   |
| C        | -1.9349727  | 4.0927776   | 7.4830201   |
| C        | -2.2588426  | 5.5545878   | 7.3342972   |
| H        | -2.4372978  | 6.0241367   | 8.3134292   |
| H        | -3.1700931  | 5.7002707   | 6.7357010   |
| H        | -1.4415516  | 6.0972407   | 6.8437654   |
| C        | -0.7279859  | 3.5636632   | 7.0635445   |
| H        | 0.0226995   | 4.2109165   | 6.6061422   |
| O        | -0.1331767  | -1.8750448  | 6.5897810   |
| H        | -1.0423814  | -1.4858852  | 6.6089461   |
| O        | 0.9231233   | 0.2757649   | 9.7280245   |
| H        | 0.3792118   | 1.0918936   | 9.6935395   |
| H        | -0.2328966  | -2.7951168  | 6.9137147   |
| H        | 0.4440197   | -0.3405187  | 10.3352427  |
| <b>B</b> |             |             |             |
| Co       | 0.44539700  | -1.02685780 | 8.12928810  |
| O        | -0.11239000 | -2.19614360 | 9.54868050  |
| O        | -1.61529140 | -3.80068940 | 10.97030830 |
| O        | -1.20529820 | -0.07563260 | 8.38853620  |
| O        | -3.49469440 | 0.93157150  | 9.11693220  |
| N        | 2.10954690  | -1.87303770 | 7.98574860  |
| N        | 1.12138480  | 0.21235330  | 6.89057800  |
| C        | 0.27395840  | -3.44332510 | 9.61528890  |
| C        | -0.51692930 | -4.35979120 | 10.38603870 |
| C        | -2.45794360 | -4.66122350 | 11.72552300 |
| H        | -2.87483740 | -5.46933870 | 11.10055660 |
| H        | -3.27345890 | -4.03041050 | 12.09619950 |
| H        | -1.92076250 | -5.10735500 | 12.58026520 |
| C        | -0.15357590 | -5.69443530 | 10.49588980 |
| H        | -0.78052330 | -6.37811330 | 11.06891180 |
| C        | 1.01379620  | -6.20657960 | 9.87865000  |
| C        | 1.35920070  | -7.66603480 | 10.01796920 |
| H        | 2.31239440  | -7.89546530 | 9.52317140  |
| H        | 0.58597510  | -8.30875870 | 9.56821850  |
| H        | 1.44915030  | -7.96147080 | 11.07490430 |
| C        | 1.80492250  | -5.33219380 | 9.16116060  |
| H        | 2.71915190  | -5.69182000 | 8.68252080  |
| C        | 1.45766930  | -3.96457140 | 9.01468520  |
| C        | 2.35999410  | -3.10225960 | 8.31971770  |
| H        | 3.34940080  | -3.51068040 | 8.06872440  |
| C        | 3.12248260  | -1.02341920 | 7.36495420  |
| H        | 3.93782890  | -1.62426200 | 6.93201730  |
| H        | 3.54476380  | -0.36158600 | 8.13866350  |
| C        | 2.40437860  | -0.19213750 | 6.30822330  |
| H        | 2.99603810  | 0.68558180  | 6.00593770  |
| H        | 2.20169350  | -0.80910070 | 5.41847460  |
| C        | 0.57482550  | 1.33466930  | 6.52849790  |
| H        | 1.12418490  | 1.96133270  | 5.81276830  |
| C        | -0.68472970 | 1.83595240  | 6.97756110  |
| C        | -1.49610760 | 1.09656930  | 7.88730290  |
| C        | -2.75442080 | 1.68904700  | 8.25620200  |
| C        | -4.76050850 | 1.44561520  | 9.51193890  |
| H        | -4.65884670 | 2.40584520  | 10.04611490 |
| H        | -5.18943830 | 0.69605250  | 10.18583210 |
| H        | -5.42864050 | 1.58549690  | 8.64508940  |
| C        | -3.14419390 | 2.91769650  | 7.74518660  |
| H        | -4.10417610 | 3.34325250  | 8.03881300  |
| C        | -2.32779600 | 3.64565220  | 6.84330200  |
| C        | -2.79001280 | 4.98001880  | 6.31872950  |
| H        | -2.92868730 | 5.70853960  | 7.13312870  |
| H        | -3.75462850 | 4.89753180  | 5.79380560  |
| H        | -2.06043900 | 5.40120330  | 5.61424220  |
| C        | -1.11783300 | 3.09375910  | 6.47781470  |
| H        | -0.46481100 | 3.62567160  | 5.78149910  |
| O        | -0.32403770 | -2.28666120 | 6.90603930  |
| O        | 1.08708580  | 0.10116420  | 9.88722170  |
| H        | 0.32488140  | 0.71318340  | 9.91371310  |
| H        | 0.74667050  | -0.69323640 | 10.36850310 |
| C        | -0.26063520 | -2.11435100 | 5.59481800  |
| C        | -1.30337130 | -1.37367150 | 4.94092310  |
| C        | 0.76331260  | -2.68025220 | 4.80713600  |
| C        | -1.22564750 | -1.16330480 | 3.55245570  |
| C        | 0.80797780  | -2.48825830 | 3.42825040  |
| H        | 1.51519090  | -3.28292710 | 5.31905870  |

|   |             |             |             |
|---|-------------|-------------|-------------|
| C | -0.18043920 | -1.70736970 | 2.80965930  |
| H | -2.00557830 | -0.58110800 | 3.05598950  |
| H | 1.60145940  | -2.94215040 | 2.83330890  |
| H | -0.14492530 | -1.53760810 | 1.73244970  |
| N | -2.35489950 | -0.94747170 | 5.70582790  |
| H | -2.91821690 | -0.17457590 | 5.37314600  |
| H | -2.21659180 | -1.01236000 | 6.71513110  |
| O | -2.49186323 | -1.29850997 | 10.13327775 |
| H | -2.30044777 | -0.38390639 | 9.81028311  |
| H | -1.67750178 | -1.76637263 | 10.44221120 |
| H | -3.21416855 | -1.31544253 | 10.80814502 |

**C**

|    |            |            |            |
|----|------------|------------|------------|
| Co | 0.6862491  | -0.9210548 | 8.5499780  |
| O  | 0.1184952  | -2.4082697 | 10.1203701 |
| O  | -1.6420705 | -4.2595628 | 10.7852210 |
| O  | -0.7306188 | 0.4804705  | 8.7370547  |
| O  | -3.1528407 | 1.4689383  | 8.8580635  |
| N  | 2.4729644  | -1.8868779 | 8.6285168  |
| N  | 1.6541506  | 0.2330762  | 7.2359220  |
| C  | 0.4538575  | -3.7193649 | 9.9231613  |
| C  | -0.4554337 | -4.7270342 | 10.3013363 |
| C  | -2.6382747 | -5.2232815 | 11.1446602 |
| H  | -2.9157259 | -5.8445682 | 10.2793657 |
| H  | -3.5067403 | -4.6448813 | 11.4749344 |
| H  | -2.2889551 | -5.8648193 | 11.9681956 |
| C  | -0.1043234 | -6.0690157 | 10.1756185 |
| H  | -0.8106799 | -6.8426248 | 10.4750461 |
| C  | 1.1583677  | -6.4494727 | 9.6826749  |
| C  | 1.5190651  | -7.9069902 | 9.5739149  |
| H  | 2.5351211  | -8.0380004 | 9.1821354  |
| H  | 0.8276004  | -8.4394237 | 8.9042066  |
| H  | 1.4681669  | -8.4035449 | 10.5540298 |
| C  | 2.0429356  | -5.4484710 | 9.3064675  |
| H  | 3.0244031  | -5.7156011 | 8.9102460  |
| C  | 1.7080558  | -4.0764799 | 9.3940410  |
| C  | 2.6855520  | -3.1335836 | 8.8853045  |
| H  | 3.6802686  | -3.5587838 | 8.6729773  |
| C  | 3.5407728  | -1.0300807 | 8.1220644  |
| H  | 4.4381065  | -1.6064291 | 7.8430904  |
| H  | 3.8116142  | -0.3301127 | 8.9280103  |
| C  | 3.0041539  | -0.2391806 | 6.9231752  |
| H  | 3.6801506  | 0.5927143  | 6.6713772  |
| H  | 2.9477881  | -0.9049591 | 6.0447804  |
| C  | 1.1128303  | 1.1733152  | 6.5273069  |
| H  | 1.6980324  | 1.6373118  | 5.7178581  |
| C  | -0.2331302 | 1.6584456  | 6.6748824  |
| C  | -1.0848923 | 1.2850342  | 7.7596364  |
| C  | -2.3994124 | 1.8574121  | 7.7877127  |
| C  | -4.4632533 | 2.0291308  | 8.9757494  |
| H  | -4.4198121 | 3.1267147  | 9.0496838  |
| H  | -4.8851135 | 1.6171572  | 9.8981193  |
| H  | -5.0985621 | 1.7462179  | 8.1211539  |
| C  | -2.8335023 | 2.7060749  | 6.7812296  |
| H  | -3.8427682 | 3.1164292  | 6.8115128  |
| C  | -1.9916228 | 3.0610405  | 5.7039450  |
| C  | -2.4991928 | 3.9722061  | 4.6211309  |
| H  | -2.8573860 | 4.9265554  | 5.0351924  |
| H  | -3.3458973 | 3.5174890  | 4.0842204  |
| H  | -1.7153177 | 4.1942254  | 3.8870376  |
| C  | -0.7065261 | 2.5440835  | 5.6813755  |
| H  | -0.0322677 | 2.8116306  | 4.8653865  |
| O  | -0.5243923 | -2.0762837 | 7.4930332  |
| O  | 1.3882918  | 0.1036494  | 10.4409249 |
| H  | 0.7042637  | 0.7975106  | 10.5070530 |
| H  | 1.1756643  | -0.5494935 | 11.1335630 |
| C  | -0.9404637 | -1.6032472 | 6.3430233  |
| C  | -2.3405814 | -1.2443715 | 6.2142325  |
| C  | -0.1016233 | -1.4322986 | 5.2169599  |
| C  | -2.7999616 | -0.6619582 | 5.0132019  |
| C  | -0.5847568 | -0.8852941 | 4.0423524  |
| H  | 0.9305588  | -1.7712754 | 5.3007721  |
| C  | -1.9350168 | -0.4756411 | 3.9508577  |
| H  | -3.8478248 | -0.3680469 | 4.9316965  |
| H  | 0.0703367  | -0.7804968 | 3.1775091  |
| H  | -2.3032114 | -0.0301484 | 3.0270114  |
| N  | -3.1553682 | -1.4802809 | 7.2676742  |

|   |            |            |            |
|---|------------|------------|------------|
| H | -2.7637746 | -1.7584479 | 8.1677365  |
| O | -2.2172753 | -1.2478584 | 10.1370476 |
| H | -1.8891641 | -0.4021160 | 9.7147118  |
| H | -4.1182428 | -1.1700510 | 7.2438029  |
| H | -0.8722309 | -2.2693891 | 10.2721109 |
| H | -2.8006902 | -0.9987946 | 10.8712579 |
